# Supplementary material for: Systems-Level Mapping of the Tumor Microenvironment Reveals Immune-Mediated Mechanisms and Potential Targets in Platinum-Resistant Ovarian Cancer
Source: Research Square preprint supplement (doi:10.21203/rs.3.rs-10385637/v1), 2026-07-22
Supplement: Supplementary file 1 [file c7841a2b50c4cfe6dd89faf7.xlsx]

## Sheet: Table S1
Table S1. Metadata for FFPE analyzed using mIF
Sample name	Pathology Status	Histology Type	Categorization	ajcc_pathologic_n	ajcc_pathologic_stage	ajcc_pathologic_t	stage	Treatment Status	Age
6589	Normal	Endometrioid adenocarcinoma	Non-cancerous	NX	Stage III	T3a	pT3aNX	Unknown	72
12838	Normal	Neoplasm	Non-cancerous					Unknown	51
12970-1AN2	Normal	Fibroma	Non-cancerous					Unknown	41
40251	Normal	Endometriotic cyst	Non-cancerous					Unknown	68
71201	Normal	Endometrioid carcinoma	Non-cancerous	N0	Stage I	T1a	pT1aN0	Unknown	55
6142	Benign	Neoplasm	Non-cancerous					Unknown	78
6718	Benign	Neoplasm	Non-cancerous	N0	Stage I	T1a	pT1a2N0MX	Unknown	53
7334	Benign	Fibroma	Non-cancerous					Unknown	78
12970	Benign	Fibroma	Non-cancerous					Unknown	41
41427	Benign	Serous cystadenoma	Non-cancerous					Unknown	70
48420	Benign	Fibroma	Non-cancerous					Unknown	68
54062	Benign		Non-cancerous					Unknown	81
66062	Primary cancer	Clear cell carcinoma	Cancerous	N0	Stage III	T3a	pT3apN0	Unknown	69
38716-D1C-1	Primary cancer	Clear cell carcinoma	Cancerous	N0	Stage I	T1c	pT1cN0	Unknown	64
38716-D2C-1	Primary cancer	Clear cell carcinoma	Cancerous	N0	Stage I	T1c	pT1cN0	Unknown	64
14257	Primary cancer	High grade serous carcinoma	Cancerous	N1	Stage III	T3c	pT3cN1	Unknown	65
62941	Primary cancer	High grade serous carcinoma	Cancerous	N0	Stage III	T3c	pT3cpN0	Unknown	73
6159	Primary cancer	Serous surface papillary carcinoma	Cancerous	N1	Stage III	T3c	pT3cpN1	Unknown	63
40960	Primary cancer	Endometrioid carcinoma	Cancerous	N0	Stage I	T1cp	pT1cpN0	Unknown	71

## Sheet: Table S2
Table S2. Metadata for frozen and fresh samples analyzed using bulk RNA-seq
Sample name	Pathology Status	Histology Type	Categorization	ajcc_pathologic_n	ajcc_pathologic_stage	ajcc_pathologic_t	stage	Treatment Status	Age
6161	Normal	Endometrioid carcinoma	Non-cancerous	NX	Stage I	T1ap	pT1apNX	Unknown	57
6242	Normal	Adenocarcinoma	Non-cancerous	N0	Stage I	T1bp	pT1bpN0	Unknown	45
6589	Normal	Endometrioid carcinoma	Non-cancerous	NX	Stage III	T3a	ypT3aNX	Unknown	72
12838	Normal	Neoplasm	Non-cancerous					Unknown	51
12970-1AN2	Normal	Fibroma	Non-cancerous					Unknown	41
14379-1AN2	Normal	High grade serous carcinoma	Non-cancerous	N0	Stage II	T2cp	pT2cpN0	Unknown	78
39998	Normal	Fibroma	Non-cancerous					Unknown	62
46828-1AN2	Normal	High grade serous carcinoma	Non-cancerous	N0	Stage III	T3bp	pT3bpN0	Unknown	45
71201	Normal	Endometrioid carcinoma	Non-cancerous	N0	Stage I	T1a	pT1aN0	Unknown	55
6142	Benign	Neoplasm	Non-cancerous					Unknown	78
12799	Benign	Cystadenoma	Non-cancerous					Unknown	69
41427	Benign	Serous cystadenoma	Non-cancerous					Unknown	70
48420	Benign	Fibroma	Non-cancerous					Unknown	68
6159	Primary cancer	Serous surface papillary carcinoma	Cancerous	N1	Stage III	T3cp	pT3cpN1	Unknown	63
6273	Primary cancer	Carcinosarcoma	Cancerous	NX	Stage III	T3ap	pT3apNX	Unknown	82
6823	Primary cancer	Clear cell carcinoma	Cancerous	N0	Stage I	T1a	pT1aN0MX	Unknown	49
7472	Primary cancer	High grade serous carcinoma	Cancerous	N1	Stage III	T3c	pT3cN1pNX	Unknown	76
14257	Primary cancer	High grade serous carcinoma	Cancerous	N1	Stage III	T3c	pT3cN1	Unknown	65
14379-1BC1	Primary cancer	High grade serous carcinoma	Cancerous	N0	Stage II	T2cp	pT2cpN0	Unknown	78
38716	Primary cancer	Clear cell carcinoma	Cancerous	N0	Stage I	T1c	pT1cN0	Unknown	64
39170	Primary cancer	Endometrioid carcinoma	Cancerous		Stage II	T2b	pT2b	Unknown	57
40960	Primary cancer	Endometrioid carcinoma	Cancerous	N0	Stage I	T1cp	pT1cpN0	Unknown	71
46828-1AC1	Primary cancer	High grade serous carcinoma	Cancerous	N0	Stage III	T3bp	pT3bpN0	Unknown	45
56302	Primary cancer	Low grade serous carcinoma	Cancerous	NX	Stage I	T1ap	pT1apNX	Unknown	45
62941	Primary cancer	High grade serous carcinoma	Cancerous	N0	Stage III	T3cp	pT3cpN0	Unknown	73
66062	Primary cancer	Clear cell carcinoma	Cancerous	N0	Stage III	T3ap	pT3apN0	Unknown	69
99855	Primary cancer	High grade serous carcinoma	Cancerous	N0	Stage II	T2ap	pT2apN0		47
UF_1	Primary cancer		Cancerous
UF_2	Primary cancer		Cancerous
UF_3	Primary cancer		Cancerous
UF_4	Primary cancer		Cancerous
UF_5	Primary cancer		Cancerous

## Sheet: Table S3
Table S3. Metadata for publicly available and fresh samples analyzed using scRNA-seq
Dataset	Sample name	GSM number	Pathology Status	Histology Type	Categorization	ajcc_pathologic_n	ajcc_pathologic_stage	ajcc_pathologic_t	stage	Treatment Status	Age	Sensitivity classification
GSE184880	Normal1	GSM5599220	Normal		Normal					Unknown	55
	Normal2	GSM5599221	Normal		Normal					Unknown	47
	Normal3	GSM5599222	Normal		Normal					Unknown	46
	Normal4	GSM5599223	Normal		Normal					Unknown	51
	Normal5	GSM5599224	Normal		Normal					Unknown	49
	Cancer1	GSM5599225	Primary cancer	High grade serous carcinoma	Cancer		Stage III		T3b	Untreated	50
	Cancer2	GSM5599226	Primary cancer	High grade serous carcinoma	Cancer		Stage II		T2b	Untreated	51
	Cancer3	GSM5599227	Primary cancer	High grade serous carcinoma	Cancer		Stage IC2		TIC2	Untreated	41
	Cancer4	GSM5599228	Primary cancer	High grade serous carcinoma	Cancer		Stage IC2		TIC2	Untreated	47
	Cancer5	GSM5599229	Primary cancer	High grade serous carcinoma	Cancer		Stage II		T2b	Untreated	57
	Cancer6	GSM5599230	Primary cancer	High grade serous carcinoma	Cancer		Stage III		T3c	Untreated	48
	Cancer7	GSM5599231	Primary cancer	High grade serous carcinoma	Cancer		Stage IC2		TIC2	Untreated	53
GSE181955	N1	GSM5514787	Normal		Normal
	OMT1	GSM5514788	Primary cancer	High grade serous carcinoma	Cancer					Untreated
	OMT3	GSM5514790	Primary cancer	High grade serous carcinoma	Cancer					Untreated
	T1	GSM5514792	Primary cancer	High grade serous carcinoma	Cancer					Untreated
	T6	GSM5514793	Primary cancer	High grade serous carcinoma	Cancer					Untreated
GSE154600	T59	GSM4675273	Primary cancer	High grade serous carcinoma	Cancer		Stage IV		T4	Treated		Resistant
	T61	GSM4675274	Primary cancer	High grade serous carcinoma	Cancer		Stage III		T3c	Treated		Refractory
	T76	GSM4675275	Primary cancer	High grade serous carcinoma	Cancer		Stage IV		T4b	Treated		Resistant
	T89	GSM4675276	Primary cancer	High grade serous carcinoma	Cancer		Stage IV		T4	Treated		Sensitive
	T90	GSM4675277	Primary cancer	High grade serous carcinoma	Cancer		Stage IV		T4a	Treated		Sensitive
In-house processing	UF_1		Primary cancer		Cancerous
	UF_2		Primary cancer		Cancerous
	UF_3		Primary cancer		Cancerous
	UF_4		Primary cancer		Cancerous

## Sheet: Table S4
Table S4. Barcodes and cell type assignment for ovarian cancer reference
Sample	Barcode	cell.type
3BAE2L	AAACCCAAGACCAAAT-1_1	9-Fibroblast
3BAE2L	AAACCCAAGTCAATCC-1_1	3-Epithelial cell
3BAE2L	AAACCCACAACCAACT-1_1	4-Fibroblast
3BAE2L	AAACCCACAAGACAAT-1_1	17-B cell
3BAE2L	AAACCCAGTCTTGAGT-1_1	3-Epithelial cell
3BAE2L	AAACCCAGTGACCTGC-1_1	15-Empty/Epithelial cell
3BAE2L	AAACGAAAGGATACAT-1_1	4-Fibroblast
3BAE2L	AAACGAAAGTGACCTT-1_1	6-Macrophage
3BAE2L	AAACGAACACAACGAG-1_1	3-Epithelial cell
3BAE2L	AAACGAACAGGACTTT-1_1	2-Epithelial cell
3BAE2L	AAACGAAGTGACTAAA-1_1	5-T cell
3BAE2L	AAACGAAGTTTACACG-1_1	3-Epithelial cell
3BAE2L	AAACGAATCAAGGTGG-1_1	9-Fibroblast
3BAE2L	AAACGAATCCCTCATG-1_1	6-Macrophage
3BAE2L	AAACGAATCGAAACAA-1_1	4-Fibroblast
3BAE2L	AAACGAATCTCATGCC-1_1	2-Epithelial cell
3BAE2L	AAACGCTAGGATTTCC-1_1	2-Epithelial cell
3BAE2L	AAACGCTAGTTCATCG-1_1	4-Fibroblast
3BAE2L	AAACGCTCAAGACGGT-1_1	2-Epithelial cell
3BAE2L	AAACGCTCACAACCGC-1_1	3-Epithelial cell
3BAE2L	AAACGCTCAGGCCTGT-1_1	14-Endothelial cell
3BAE2L	AAACGCTCAGGGTTGA-1_1	4-Fibroblast
3BAE2L	AAACGCTCATACCAGT-1_1	5-T cell
3BAE2L	AAACGCTCATCACGGC-1_1	6-Macrophage
3BAE2L	AAACGCTCATTGCCTC-1_1	6-Macrophage
3BAE2L	AAACGCTTCAAGCCTA-1_1	20-Macrophage
3BAE2L	AAACGCTTCAATGTCG-1_1	5-T cell
3BAE2L	AAACGCTTCGTTGTGA-1_1	20-Macrophage
3BAE2L	AAACGCTTCTTCGTGC-1_1	6-Macrophage
3BAE2L	AAAGAACAGGTTGCCC-1_1	14-Endothelial cell
3BAE2L	AAAGAACAGTCCGCCA-1_1	14-Endothelial cell
3BAE2L	AAAGAACCAAAGGGCT-1_1	4-Fibroblast
3BAE2L	AAAGAACCAAGAATGT-1_1	5-T cell
3BAE2L	AAAGAACCACAACGCC-1_1	12-NK cell
3BAE2L	AAAGAACCACACCGCA-1_1	4-Fibroblast
3BAE2L	AAAGAACGTATCGAGG-1_1	4-Fibroblast
3BAE2L	AAAGAACTCATTTCGT-1_1	19-Epithelial cell
3BAE2L	AAAGAACTCTACCACC-1_1	12-NK cell
3BAE2L	AAAGGATCAAGCAATA-1_1	9-Fibroblast
3BAE2L	AAAGGATCACTGGAAG-1_1	3-Epithelial cell
3BAE2L	AAAGGATCATCCCGTT-1_1	2-Epithelial cell
3BAE2L	AAAGGATGTCATTGCA-1_1	9-Fibroblast
3BAE2L	AAAGGATGTGTTGACT-1_1	19-Epithelial cell
3BAE2L	AAAGGATTCAAACGTC-1_1	6-Macrophage
3BAE2L	AAAGGGCCACGTAACT-1_1	3-Epithelial cell
3BAE2L	AAAGGGCGTGTGTGTT-1_1	6-Macrophage
3BAE2L	AAAGGGCGTTTCTATC-1_1	14-Endothelial cell
3BAE2L	AAAGGGCTCCGTTTCG-1_1	12-NK cell
3BAE2L	AAAGGGCTCCTGGTCT-1_1	12-NK cell
3BAE2L	AAAGGGCTCGGAATTC-1_1	2-Epithelial cell
3BAE2L	AAAGGTAAGCCAGACA-1_1	2-Epithelial cell
3BAE2L	AAAGGTAAGTGGCAGT-1_1	2-Epithelial cell
3BAE2L	AAAGGTACAATTCTCT-1_1	4-Fibroblast
3BAE2L	AAAGGTACACCCTTGT-1_1	2-Epithelial cell
3BAE2L	AAAGGTACATTAGGCT-1_1	6-Macrophage
3BAE2L	AAAGGTAGTAATCAAG-1_1	6-Macrophage
3BAE2L	AAAGGTAGTTCGAAGG-1_1	17-B cell
3BAE2L	AAAGGTAGTTCGGTTA-1_1	5-T cell
3BAE2L	AAAGGTATCACACGAT-1_1	2-Epithelial cell
3BAE2L	AAAGGTATCATTGGTG-1_1	12-NK cell
3BAE2L	AAAGGTATCCTTTAGT-1_1	2-Epithelial cell
3BAE2L	AAAGTCCAGCGCATCC-1_1	6-Macrophage
3BAE2L	AAAGTCCCAGTATACC-1_1	5-T cell
3BAE2L	AAAGTCCTCATGACAC-1_1	4-Fibroblast
3BAE2L	AAAGTCCTCCGAAATC-1_1	6-Macrophage
3BAE2L	AAAGTGAAGTACAGAT-1_1	9-Fibroblast
3BAE2L	AAAGTGACACGGCGTT-1_1	9-Fibroblast
3BAE2L	AAAGTGACAGCCTATA-1_1	3-Epithelial cell
3BAE2L	AAAGTGAGTTGGCCGT-1_1	9-Fibroblast
3BAE2L	AAAGTGATCATCCCGT-1_1	2-Epithelial cell
3BAE2L	AAATGGAAGACGCTCC-1_1	15-Empty/Epithelial cell
3BAE2L	AAATGGAAGATCACTC-1_1	3-Epithelial cell
3BAE2L	AAATGGAAGCGTTAGG-1_1	4-Fibroblast
3BAE2L	AAATGGACAGGCTATT-1_1	2-Epithelial cell
3BAE2L	AAATGGACATCCCACT-1_1	2-Epithelial cell
3BAE2L	AAATGGAGTCGGCCTA-1_1	4-Fibroblast
3BAE2L	AAATGGAGTGTTCGAT-1_1	12-NK cell
3BAE2L	AAATGGATCCATTGGA-1_1	4-Fibroblast
3BAE2L	AACAAAGCAGCTGCCA-1_1	2-Epithelial cell
3BAE2L	AACAAAGCATCACAGT-1_1	12-NK cell
3BAE2L	AACAAAGGTAAGCGGT-1_1	9-Fibroblast
3BAE2L	AACAAAGGTACCACGC-1_1	3-Epithelial cell
3BAE2L	AACAAAGTCCGTATAG-1_1	17-B cell
3BAE2L	AACAAAGTCTTAGCTT-1_1	6-Macrophage
3BAE2L	AACAACCAGCCTGAGA-1_1	5-T cell
3BAE2L	AACAACCAGCGTTACT-1_1	3-Epithelial cell
3BAE2L	AACAACCAGGATACGC-1_1	2-Epithelial cell
3BAE2L	AACAACCCATATCTCT-1_1	6-Macrophage
3BAE2L	AACAACCGTAGGACTG-1_1	2-Epithelial cell
3BAE2L	AACAACCGTATTCTCT-1_1	17-B cell
3BAE2L	AACAACCGTCGTGATT-1_1	5-T cell
3BAE2L	AACAACCTCGATCCAA-1_1	2-Epithelial cell
3BAE2L	AACAAGAAGCGATGCA-1_1	13-Macrophage
3BAE2L	AACAAGACAAATTGGA-1_1	6-Macrophage
3BAE2L	AACAAGACATGGGTTT-1_1	12-NK cell
3BAE2L	AACAAGAGTGCAGATG-1_1	2-Epithelial cell
3BAE2L	AACAAGAGTGCAGTGA-1_1	6-Macrophage
3BAE2L	AACACACAGGCTCAAG-1_1	2-Epithelial cell
3BAE2L	AACACACAGTGTCATC-1_1	6-Macrophage
3BAE2L	AACACACCAAAGGCAC-1_1	4-Fibroblast
3BAE2L	AACACACCATTGAAAG-1_1	6-Macrophage
3BAE2L	AACACACCATTGCCGG-1_1	3-Epithelial cell
3BAE2L	AACACACGTCAAGCCC-1_1	4-Fibroblast
3BAE2L	AACACACGTGCGTGCT-1_1	8-Macrophage
3BAE2L	AACAGGGGTGACCGTC-1_1	4-Fibroblast
3BAE2L	AACAGGGTCATGACAC-1_1	12-NK cell
3BAE2L	AACAGGGTCGTTGTAG-1_1	14-Endothelial cell
3BAE2L	AACCAACAGCGTGCCT-1_1	5-T cell
3BAE2L	AACCAACCAGGACTTT-1_1	4-Fibroblast
3BAE2L	AACCAACCATGGCTGC-1_1	12-NK cell
3BAE2L	AACCAACGTAACCAGG-1_1	3-Epithelial cell
3BAE2L	AACCAACGTCGAACAG-1_1	12-NK cell
3BAE2L	AACCAACTCATAGAGA-1_1	3-Epithelial cell
3BAE2L	AACCAACTCATCTACT-1_1	9-Fibroblast
3BAE2L	AACCAACTCCCATACC-1_1	15-Empty/Epithelial cell
3BAE2L	AACCACATCAGGACAG-1_1	3-Epithelial cell
3BAE2L	AACCACATCATGCATG-1_1	12-NK cell
3BAE2L	AACCACATCCTTATGT-1_1	9-Fibroblast
3BAE2L	AACCATGAGGACCCAA-1_1	6-Macrophage
3BAE2L	AACCATGCAATTGCTG-1_1	9-Fibroblast
3BAE2L	AACCATGCATTGTACG-1_1	4-Fibroblast
3BAE2L	AACCATGGTCCACTTC-1_1	12-NK cell
3BAE2L	AACCATGTCATGGTAC-1_1	12-NK cell
3BAE2L	AACCATGTCCGTCAAA-1_1	2-Epithelial cell
3BAE2L	AACCATGTCGCCGAAC-1_1	2-Epithelial cell
3BAE2L	AACCATGTCGTCTACC-1_1	4-Fibroblast
3BAE2L	AACCCAAAGGTACAGC-1_1	4-Fibroblast
3BAE2L	AACCCAAAGTATGATG-1_1	3-Epithelial cell
3BAE2L	AACCCAACAAGTGGTG-1_1	4-Fibroblast
3BAE2L	AACCCAACACTACAGT-1_1	2-Epithelial cell
3BAE2L	AACCCAACAGGCATTT-1_1	6-Macrophage
3BAE2L	AACCCAAGTGGTCCCA-1_1	3-Epithelial cell
3BAE2L	AACCCAAGTTAAGGAT-1_1	4-Fibroblast
3BAE2L	AACCCAAGTTCCAAAC-1_1	14-Endothelial cell
3BAE2L	AACCCAATCGGTGTAT-1_1	9-Fibroblast
3BAE2L	AACCTGAAGTCATGGG-1_1	12-NK cell
3BAE2L	AACCTGACACCCAAGC-1_1	3-Epithelial cell
3BAE2L	AACCTGACATCGATAC-1_1	2-Epithelial cell
3BAE2L	AACCTGAGTGCCCGTA-1_1	9-Fibroblast
3BAE2L	AACCTGAGTGCCGTTG-1_1	9-Fibroblast
3BAE2L	AACCTGAGTGGAATGC-1_1	6-Macrophage
3BAE2L	AACCTGAGTGTACAGG-1_1	17-B cell
3BAE2L	AACCTGATCCATTCGC-1_1	2-Epithelial cell
3BAE2L	AACCTGATCCCGTAAA-1_1	4-Fibroblast
3BAE2L	AACCTTTAGAATAGTC-1_1	5-T cell
3BAE2L	AACCTTTGTAGACGGT-1_1	3-Epithelial cell
3BAE2L	AACCTTTGTTCCCACT-1_1	2-Epithelial cell
3BAE2L	AACCTTTGTTGCATGT-1_1	6-Macrophage
3BAE2L	AACGAAAAGAGGTCGT-1_1	15-Empty/Epithelial cell
3BAE2L	AACGAAAAGAGTCAGC-1_1	3-Epithelial cell
3BAE2L	AACGAAAGTTGCTCGG-1_1	3-Epithelial cell
3BAE2L	AACGAAATCTCAACGA-1_1	19-Epithelial cell
3BAE2L	AACGGGAAGGTATCTC-1_1	6-Macrophage
3BAE2L	AACGGGAGTACCGCGT-1_1	2-Epithelial cell
3BAE2L	AACGGGAGTCGTTATG-1_1	5-T cell
3BAE2L	AACGGGAGTGCTTCAA-1_1	2-Epithelial cell
3BAE2L	AACGGGATCCACTAGA-1_1	2-Epithelial cell
3BAE2L	AACGGGATCGCCAGAC-1_1	15-Empty/Epithelial cell
3BAE2L	AACGGGATCGTCTACC-1_1	6-Macrophage
3BAE2L	AACGTCAAGATCACTC-1_1	6-Macrophage
3BAE2L	AACGTCAAGCGTGTTT-1_1	9-Fibroblast
3BAE2L	AACGTCACACCGCTAG-1_1	5-T cell
3BAE2L	AACGTCACAGTCGCAC-1_1	15-Empty/Epithelial cell
3BAE2L	AACGTCAGTAGTCTGT-1_1	15-Empty/Epithelial cell
3BAE2L	AACGTCAGTCGAGTGA-1_1	9-Fibroblast
3BAE2L	AACGTCAGTGGATTTC-1_1	2-Epithelial cell
3BAE2L	AACGTCAGTTTGGCTA-1_1	14-Endothelial cell
3BAE2L	AACTTCTCACCTGAAT-1_1	2-Epithelial cell
3BAE2L	AACTTCTCAGTCTTCC-1_1	4-Fibroblast
3BAE2L	AACTTCTCATATGGCT-1_1	19-Epithelial cell
3BAE2L	AACTTCTCATCATTTC-1_1	2-Epithelial cell
3BAE2L	AACTTCTGTGCATGAG-1_1	4-Fibroblast
3BAE2L	AACTTCTGTTAAGACA-1_1	5-T cell
3BAE2L	AACTTCTGTTCAAAGA-1_1	13-Macrophage
3BAE2L	AACTTCTGTTTAGAGA-1_1	2-Epithelial cell
3BAE2L	AACTTCTTCAAACGTC-1_1	2-Epithelial cell
3BAE2L	AACTTCTTCAAATGCC-1_1	2-Epithelial cell
3BAE2L	AACTTCTTCCCAAGTA-1_1	6-Macrophage
3BAE2L	AACTTCTTCCGGCAGT-1_1	5-T cell
3BAE2L	AACTTCTTCTGTTGGA-1_1	3-Epithelial cell
3BAE2L	AAGAACAGTACAGTAA-1_1	17-B cell
3BAE2L	AAGAACAGTCACTCAA-1_1	9-Fibroblast
3BAE2L	AAGAACAGTCACTGAT-1_1	9-Fibroblast
3BAE2L	AAGAACATCAAGCTGT-1_1	2-Epithelial cell
3BAE2L	AAGAACATCAGGGATG-1_1	17-B cell
3BAE2L	AAGACAAAGGTCCCGT-1_1	13-Macrophage
3BAE2L	AAGACAACAGGTTCGC-1_1	5-T cell
3BAE2L	AAGACAAGTACTCCCT-1_1	4-Fibroblast
3BAE2L	AAGACAAGTGAGTAAT-1_1	2-Epithelial cell
3BAE2L	AAGACAAGTGGTCTCG-1_1	2-Epithelial cell
3BAE2L	AAGACAAGTTCAATCG-1_1	9-Fibroblast
3BAE2L	AAGACAATCACCTTGC-1_1	3-Epithelial cell
3BAE2L	AAGACAATCCCTCATG-1_1	14-Endothelial cell
3BAE2L	AAGACAATCGCCTATC-1_1	2-Epithelial cell
3BAE2L	AAGACTCAGAAGCGGG-1_1	9-Fibroblast
3BAE2L	AAGACTCAGCATGAAT-1_1	6-Macrophage
3BAE2L	AAGACTCGTGCGAACA-1_1	4-Fibroblast
3BAE2L	AAGACTCGTTGTGCCG-1_1	5-T cell
3BAE2L	AAGACTCGTTTCGTTT-1_1	5-T cell
3BAE2L	AAGACTCTCATTACCT-1_1	15-Empty/Epithelial cell
3BAE2L	AAGATAGAGACAACAT-1_1	5-T cell
3BAE2L	AAGATAGAGTTGCGAG-1_1	6-Macrophage
3BAE2L	AAGATAGCACAAATCC-1_1	4-Fibroblast
3BAE2L	AAGATAGCAGCCATTA-1_1	9-Fibroblast
3BAE2L	AAGATAGGTAGATGTA-1_1	4-Fibroblast
3BAE2L	AAGATAGGTTCTTGCC-1_1	14-Endothelial cell
3BAE2L	AAGATAGGTTTAGAGA-1_1	2-Epithelial cell
3BAE2L	AAGATAGTCAGCGTCG-1_1	12-NK cell
3BAE2L	AAGATAGTCCAAGGGA-1_1	15-Empty/Epithelial cell
3BAE2L	AAGCATCCATCCGTGG-1_1	6-Macrophage
3BAE2L	AAGCATCCATGCGGTC-1_1	9-Fibroblast
3BAE2L	AAGCATCTCCAGTGCG-1_1	5-T cell
3BAE2L	AAGCATCTCGAAATCC-1_1	2-Epithelial cell
3BAE2L	AAGCATCTCTATCGCC-1_1	6-Macrophage
3BAE2L	AAGCCATAGCTGACCC-1_1	9-Fibroblast
3BAE2L	AAGCCATAGTCGCCCA-1_1	5-T cell
3BAE2L	AAGCCATGTAAGATCA-1_1	6-Macrophage
3BAE2L	AAGCCATGTAGTAAGT-1_1	18-T cell
3BAE2L	AAGCCATGTCGTCTCT-1_1	3-Epithelial cell
3BAE2L	AAGCCATGTTGGCCTG-1_1	3-Epithelial cell
3BAE2L	AAGCCATTCAGCATTG-1_1	3-Epithelial cell
3BAE2L	AAGCGAGCAAGCTCTA-1_1	9-Fibroblast
3BAE2L	AAGCGAGTCAACTGGT-1_1	14-Endothelial cell
3BAE2L	AAGCGAGTCTGAGGCC-1_1	5-T cell
3BAE2L	AAGCGTTCAGCTCTGG-1_1	5-T cell
3BAE2L	AAGCGTTCATTGGCAT-1_1	4-Fibroblast
3BAE2L	AAGCGTTGTATGTGTC-1_1	9-Fibroblast
3BAE2L	AAGCGTTTCAAGCCCG-1_1	2-Epithelial cell
3BAE2L	AAGCGTTTCCAGTGTA-1_1	3-Epithelial cell
3BAE2L	AAGCGTTTCCGCCTAT-1_1	5-T cell
3BAE2L	AAGCGTTTCGTTCTCG-1_1	4-Fibroblast
3BAE2L	AAGGAATAGAGCAAGA-1_1	3-Epithelial cell
3BAE2L	AAGGAATAGCTTAGTC-1_1	9-Fibroblast
3BAE2L	AAGGAATCACGGCCAT-1_1	6-Macrophage
3BAE2L	AAGGAATCAGAGTTCT-1_1	6-Macrophage
3BAE2L	AAGGAATCATCCGGTG-1_1	2-Epithelial cell
3BAE2L	AAGGAATGTAGTGGCA-1_1	4-Fibroblast
3BAE2L	AAGGAATGTGCCTTCT-1_1	6-Macrophage
3BAE2L	AAGGAATGTTGGCTAT-1_1	3-Epithelial cell
3BAE2L	AAGGAATTCGCTCCTA-1_1	2-Epithelial cell
3BAE2L	AAGGTAAAGATGGTAT-1_1	2-Epithelial cell
3BAE2L	AAGGTAAAGCTCGCAC-1_1	4-Fibroblast
3BAE2L	AAGGTAACAATAGGGC-1_1	2-Epithelial cell
3BAE2L	AAGGTAACACTACGGC-1_1	17-B cell
3BAE2L	AAGGTAACAGCAGGAT-1_1	4-Fibroblast
3BAE2L	AAGGTAATCATCTACT-1_1	2-Epithelial cell
3BAE2L	AAGGTAATCTATGTGG-1_1	9-Fibroblast
3BAE2L	AAGTACCAGCCTAGGA-1_1	3-Epithelial cell
3BAE2L	AAGTACCCAATTCGTG-1_1	2-Epithelial cell
3BAE2L	AAGTACCCACGACTAT-1_1	2-Epithelial cell
3BAE2L	AAGTACCCAGGTGTTT-1_1	2-Epithelial cell
3BAE2L	AAGTACCCATCCGCGA-1_1	4-Fibroblast
3BAE2L	AAGTACCGTACGTGAG-1_1	3-Epithelial cell
3BAE2L	AAGTACCGTCCACTCT-1_1	14-Endothelial cell
3BAE2L	AAGTACCGTCCATAGT-1_1	3-Epithelial cell
3BAE2L	AAGTACCTCTGTACAG-1_1	9-Fibroblast
3BAE2L	AAGTACCTCTTCCCAG-1_1	3-Epithelial cell
3BAE2L	AAGTCGTAGAGGCGTT-1_1	2-Epithelial cell
3BAE2L	AAGTCGTAGCGGTATG-1_1	14-Endothelial cell
3BAE2L	AAGTCGTAGCGTGAGT-1_1	3-Epithelial cell
3BAE2L	AAGTCGTAGGATTCCT-1_1	2-Epithelial cell
3BAE2L	AAGTCGTCAGAACTCT-1_1	4-Fibroblast
3BAE2L	AAGTCGTCAGGTGAGT-1_1	2-Epithelial cell
3BAE2L	AAGTCGTGTACTGCCG-1_1	6-Macrophage
3BAE2L	AAGTGAACATCGGCCA-1_1	12-NK cell
3BAE2L	AAGTGAAGTGCATGAG-1_1	3-Epithelial cell
3BAE2L	AAGTTCGAGAACCGCA-1_1	9-Fibroblast
3BAE2L	AAGTTCGAGCGCCGTT-1_1	4-Fibroblast
3BAE2L	AAGTTCGAGTGATAGT-1_1	9-Fibroblast
3BAE2L	AAGTTCGCAACCGTAT-1_1	9-Fibroblast
3BAE2L	AAGTTCGCAACTGCCG-1_1	9-Fibroblast
3BAE2L	AAGTTCGCAAGATTGA-1_1	14-Endothelial cell
3BAE2L	AAGTTCGCAGTTGGTT-1_1	17-B cell
3BAE2L	AAGTTCGGTCAGGTAG-1_1	4-Fibroblast
3BAE2L	AAGTTCGGTGGGAGAG-1_1	4-Fibroblast
3BAE2L	AAGTTCGTCATCTCTA-1_1	4-Fibroblast
3BAE2L	AAGTTCGTCTACTATC-1_1	6-Macrophage
3BAE2L	AATAGAGAGATCGGTG-1_1	13-Macrophage
3BAE2L	AATAGAGAGCCTGAAG-1_1	5-T cell
3BAE2L	AATAGAGAGTAGACAT-1_1	2-Epithelial cell
3BAE2L	AATAGAGCACATATGC-1_1	3-Epithelial cell
3BAE2L	AATAGAGCACATGTTG-1_1	2-Epithelial cell
3BAE2L	AATAGAGCAGACGATG-1_1	2-Epithelial cell
3BAE2L	AATAGAGCAGAGCCCT-1_1	4-Fibroblast
3BAE2L	AATAGAGGTCTCGCGA-1_1	9-Fibroblast
3BAE2L	AATCACGAGGTTAAAC-1_1	4-Fibroblast
3BAE2L	AATCACGCACTCTAGA-1_1	9-Fibroblast
3BAE2L	AATCACGGTCATGACT-1_1	6-Macrophage
3BAE2L	AATCACGGTCCTACGG-1_1	2-Epithelial cell
3BAE2L	AATCACGGTCGAATTC-1_1	12-NK cell
3BAE2L	AATCGACAGCGCTGAA-1_1	2-Epithelial cell
3BAE2L	AATCGACCAGGTTCGC-1_1	2-Epithelial cell
3BAE2L	AATCGACCATCCGATA-1_1	14-Endothelial cell
3BAE2L	AATCGACGTCAGGTAG-1_1	3-Epithelial cell
3BAE2L	AATCGACGTTAGGAGC-1_1	2-Epithelial cell
3BAE2L	AATCGACGTTATGACC-1_1	4-Fibroblast
3BAE2L	AATCGACTCAATCGGT-1_1	2-Epithelial cell
3BAE2L	AATCGACTCATCGCTC-1_1	18-T cell
3BAE2L	AATCGACTCCCGTTGT-1_1	2-Epithelial cell
3BAE2L	AATCGACTCGTTTACT-1_1	13-Macrophage
3BAE2L	AATCGTGAGGTCTTTG-1_1	2-Epithelial cell
3BAE2L	AATCGTGAGTCACGCC-1_1	21-T cell
3BAE2L	AATCGTGCAACAAAGT-1_1	4-Fibroblast
3BAE2L	AATCGTGCAACTCATG-1_1	6-Macrophage
3BAE2L	AATCGTGCACTAGGCC-1_1	6-Macrophage
3BAE2L	AATCGTGGTCGCATCG-1_1	3-Epithelial cell
3BAE2L	AATCGTGTCCCAGGAC-1_1	3-Epithelial cell
3BAE2L	AATCGTGTCGAGGCAA-1_1	13-Macrophage
3BAE2L	AATGAAGCAACATCGT-1_1	15-Empty/Epithelial cell
3BAE2L	AATGAAGCAGCAAGAC-1_1	3-Epithelial cell
3BAE2L	AATGAAGTCTCGAGTA-1_1	14-Endothelial cell
3BAE2L	AATGACCAGTGGAATT-1_1	4-Fibroblast
3BAE2L	AATGACCCAATTGAAG-1_1	6-Macrophage
3BAE2L	AATGACCCATCATCCC-1_1	9-Fibroblast
3BAE2L	AATGACCGTACCGTGC-1_1	2-Epithelial cell
3BAE2L	AATGACCGTGGATGAC-1_1	5-T cell
3BAE2L	AATGACCTCAGCACCG-1_1	3-Epithelial cell
3BAE2L	AATGACCTCATCTCTA-1_1	9-Fibroblast
3BAE2L	AATGACCTCATTACCT-1_1	2-Epithelial cell
3BAE2L	AATGACCTCCACAAGT-1_1	9-Fibroblast
3BAE2L	AATGACCTCTAGCAAC-1_1	19-Epithelial cell
3BAE2L	AATGACCTCTGGGCAC-1_1	5-T cell
3BAE2L	AATGACCTCTTCACGC-1_1	2-Epithelial cell
3BAE2L	AATGCCAAGACGTCGA-1_1	3-Epithelial cell
3BAE2L	AATGCCAAGCCATTGT-1_1	6-Macrophage
3BAE2L	AATGCCAAGCTATCCA-1_1	4-Fibroblast
3BAE2L	AATGCCAAGGTCCTGC-1_1	5-T cell
3BAE2L	AATGCCACACAGCATT-1_1	1-Fibroblast
3BAE2L	AATGCCACAGCGGATA-1_1	6-Macrophage
3BAE2L	AATGCCAGTGACCGTC-1_1	9-Fibroblast
3BAE2L	AATGCCAGTTTGACAC-1_1	9-Fibroblast
3BAE2L	AATGCCATCGGTTCAA-1_1	12-NK cell
3BAE2L	AATGGAAAGTAGGGTC-1_1	4-Fibroblast
3BAE2L	AATGGAAGTGACTGTT-1_1	2-Epithelial cell
3BAE2L	AATGGAATCCAATCTT-1_1	2-Epithelial cell
3BAE2L	AATGGCTAGCAGCAGT-1_1	2-Epithelial cell
3BAE2L	AATGGCTAGTCAAGCG-1_1	9-Fibroblast
3BAE2L	AATGGCTCAGCGGATA-1_1	17-B cell
3BAE2L	AATGGCTGTAAGTTAG-1_1	4-Fibroblast
3BAE2L	AATGGCTGTAGACACG-1_1	19-Epithelial cell
3BAE2L	AATGGCTGTAGCTTGT-1_1	2-Epithelial cell
3BAE2L	AATTCCTAGAGCAAGA-1_1	3-Epithelial cell
3BAE2L	AATTCCTAGCTCTTCC-1_1	17-B cell
3BAE2L	AATTCCTAGGAAGTAG-1_1	4-Fibroblast
3BAE2L	AATTCCTCAAGCACCC-1_1	2-Epithelial cell
3BAE2L	AATTCCTCAGTATACC-1_1	6-Macrophage
3BAE2L	AATTCCTCATCTGTTT-1_1	3-Epithelial cell
3BAE2L	AATTCCTCATTGACCA-1_1	5-T cell
3BAE2L	AATTCCTGTCCTGTTC-1_1	9-Fibroblast
3BAE2L	AATTCCTGTCTAGTGT-1_1	2-Epithelial cell
3BAE2L	AATTCCTGTGCTGTCG-1_1	18-T cell
3BAE2L	AATTCCTGTGTCCTAA-1_1	13-Macrophage
3BAE2L	AATTCCTTCCACACCT-1_1	2-Epithelial cell
3BAE2L	AATTCCTTCTTACCAT-1_1	17-B cell
3BAE2L	AATTTCCAGAGCAACC-1_1	2-Epithelial cell
3BAE2L	AATTTCCCACTCACTC-1_1	12-NK cell
3BAE2L	AATTTCCCAGAAACCG-1_1	3-Epithelial cell
3BAE2L	AATTTCCCATAACGGG-1_1	9-Fibroblast
3BAE2L	AATTTCCGTCCACACG-1_1	17-B cell
3BAE2L	AATTTCCGTGATGGCA-1_1	6-Macrophage
3BAE2L	AATTTCCGTGGCTGAA-1_1	9-Fibroblast
3BAE2L	AATTTCCTCTGAACGT-1_1	5-T cell
3BAE2L	ACAAAGAAGGAGACCT-1_1	19-Epithelial cell
3BAE2L	ACAAAGAGTCGAAGCA-1_1	12-NK cell
3BAE2L	ACAAAGAGTGGGTCAA-1_1	19-Epithelial cell
3BAE2L	ACAAAGATCATTCATC-1_1	18-T cell
3BAE2L	ACAAAGATCCGCGAGT-1_1	2-Epithelial cell
3BAE2L	ACAAAGATCGGAAGGT-1_1	3-Epithelial cell
3BAE2L	ACAAAGATCTTTGCTA-1_1	6-Macrophage
3BAE2L	ACAACCAAGTGTAGAT-1_1	18-T cell
3BAE2L	ACAACCACAACGATCT-1_1	5-T cell
3BAE2L	ACAACCACATCCGTGG-1_1	15-Empty/Epithelial cell
3BAE2L	ACAACCACATCGCTCT-1_1	18-T cell
3BAE2L	ACAACCACATGGTGGA-1_1	2-Epithelial cell
3BAE2L	ACAACCACATGTTCGA-1_1	18-T cell
3BAE2L	ACAACCAGTTCTTAGG-1_1	23-Macrophage
3BAE2L	ACAACCAGTTGACTGT-1_1	9-Fibroblast
3BAE2L	ACAACCATCCGAGTGC-1_1	3-Epithelial cell
3BAE2L	ACAACCATCGAGAATA-1_1	2-Epithelial cell
3BAE2L	ACAACCATCGGTGAAG-1_1	5-T cell
3BAE2L	ACAAGCTAGAACCGCA-1_1	3-Epithelial cell
3BAE2L	ACAAGCTAGAGCATCG-1_1	19-Epithelial cell
3BAE2L	ACAAGCTAGCCGTTAT-1_1	4-Fibroblast
3BAE2L	ACAAGCTCACTATCGA-1_1	3-Epithelial cell
3BAE2L	ACAAGCTGTGGCGTAA-1_1	21-T cell
3BAE2L	ACAAGCTGTTGCATCA-1_1	12-NK cell
3BAE2L	ACAAGCTTCAGCACCG-1_1	14-Endothelial cell
3BAE2L	ACAAGCTTCCACGGGT-1_1	6-Macrophage
3BAE2L	ACAAGCTTCTATACGG-1_1	4-Fibroblast
3BAE2L	ACACAGTAGGAACTAT-1_1	15-Empty/Epithelial cell
3BAE2L	ACACAGTCACTTTAGG-1_1	2-Epithelial cell
3BAE2L	ACACAGTCATTGCTGA-1_1	9-Fibroblast
3BAE2L	ACACAGTGTATTGCCA-1_1	14-Endothelial cell
3BAE2L	ACACAGTTCCCGAAAT-1_1	6-Macrophage
3BAE2L	ACACAGTTCGTGCACG-1_1	2-Epithelial cell
3BAE2L	ACACAGTTCGTTCTAT-1_1	2-Epithelial cell
3BAE2L	ACACAGTTCTTCTGTA-1_1	5-T cell
3BAE2L	ACACCAAAGCATGCGA-1_1	4-Fibroblast
3BAE2L	ACACCAAAGTAGCCAG-1_1	2-Epithelial cell
3BAE2L	ACACCAACAACCGCCA-1_1	6-Macrophage
3BAE2L	ACACCAACAAGGTTGG-1_1	3-Epithelial cell
3BAE2L	ACACCAACAAGTTTGC-1_1	3-Epithelial cell
3BAE2L	ACACCAACAGGACTTT-1_1	9-Fibroblast
3BAE2L	ACACCAAGTCACTGAT-1_1	14-Endothelial cell
3BAE2L	ACACGCGAGCCGTTGC-1_1	9-Fibroblast
3BAE2L	ACACGCGCATACTTTC-1_1	3-Epithelial cell
3BAE2L	ACACGCGGTAGTGTGG-1_1	4-Fibroblast
3BAE2L	ACACGCGGTATCAGGG-1_1	4-Fibroblast
3BAE2L	ACACGCGTCCCGTTGT-1_1	5-T cell
3BAE2L	ACACGCGTCTGCACCT-1_1	12-NK cell
3BAE2L	ACACGCGTCTTTGGAG-1_1	5-T cell
3BAE2L	ACACTGAAGCCTAGGA-1_1	9-Fibroblast
3BAE2L	ACACTGAAGGTTGGTG-1_1	2-Epithelial cell
3BAE2L	ACACTGAAGTATTCCG-1_1	4-Fibroblast
3BAE2L	ACACTGAAGTTGGAGC-1_1	4-Fibroblast
3BAE2L	ACACTGACAATTTCCT-1_1	4-Fibroblast
3BAE2L	ACACTGACAGAGTAAT-1_1	2-Epithelial cell
3BAE2L	ACACTGAGTATGTCCA-1_1	6-Macrophage
3BAE2L	ACACTGATCCGCGAGT-1_1	3-Epithelial cell
3BAE2L	ACACTGATCCTTACCG-1_1	2-Epithelial cell
3BAE2L	ACAGAAACAAATCAGA-1_1	2-Epithelial cell
3BAE2L	ACAGAAACAATGGGTG-1_1	15-Empty/Epithelial cell
3BAE2L	ACAGAAAGTCGACTTA-1_1	2-Epithelial cell
3BAE2L	ACAGAAATCCTTCTGG-1_1	15-Empty/Epithelial cell
3BAE2L	ACAGCCGAGAAAGCGA-1_1	19-Epithelial cell
3BAE2L	ACAGCCGCAGAGTCAG-1_1	5-T cell
3BAE2L	ACAGCCGCAGCGCGTT-1_1	9-Fibroblast
3BAE2L	ACAGCCGCATCTCATT-1_1	4-Fibroblast
3BAE2L	ACAGCCGGTGTCCGTG-1_1	2-Epithelial cell
3BAE2L	ACAGCCGGTTAATCGC-1_1	17-B cell
3BAE2L	ACAGCCGGTTACACTG-1_1	4-Fibroblast
3BAE2L	ACAGCCGTCATCACAG-1_1	6-Macrophage
3BAE2L	ACAGCCGTCCCTATTA-1_1	3-Epithelial cell
3BAE2L	ACAGCCGTCCTTCTTC-1_1	15-Empty/Epithelial cell
3BAE2L	ACAGCCGTCGATCCAA-1_1	9-Fibroblast
3BAE2L	ACAGGGACACAGGATG-1_1	15-Empty/Epithelial cell
3BAE2L	ACAGGGACACGAAGAC-1_1	6-Macrophage
3BAE2L	ACAGGGAGTGAGTTTC-1_1	15-Empty/Epithelial cell
3BAE2L	ACAGGGAGTGCGCTCA-1_1	3-Epithelial cell
3BAE2L	ACAGGGATCCAAGCCG-1_1	4-Fibroblast
3BAE2L	ACAGGGATCGGTAGGA-1_1	6-Macrophage
3BAE2L	ACATCCCCAACCCGCA-1_1	4-Fibroblast
3BAE2L	ACATCCCGTCGCTTGG-1_1	17-B cell
3BAE2L	ACATCCCGTCTGCCTT-1_1	5-T cell
3BAE2L	ACATCCCGTGATGGCA-1_1	9-Fibroblast
3BAE2L	ACATCCCTCCGTTGGG-1_1	2-Epithelial cell
3BAE2L	ACATCCCTCGTAGTCA-1_1	15-Empty/Epithelial cell
3BAE2L	ACATCCCTCTCACCCA-1_1	13-Macrophage
3BAE2L	ACATCGAAGCGATGGT-1_1	4-Fibroblast
3BAE2L	ACATCGAGTCGTGCCA-1_1	5-T cell
3BAE2L	ACATCGAGTTCAAAGA-1_1	4-Fibroblast
3BAE2L	ACATCGATCCTCACGT-1_1	2-Epithelial cell
3BAE2L	ACATCGATCTTTCGAT-1_1	2-Epithelial cell
3BAE2L	ACATGCACAGGTTTAC-1_1	3-Epithelial cell
3BAE2L	ACATGCACAGTACTAC-1_1	6-Macrophage
3BAE2L	ACATGCAGTCCGAAGA-1_1	2-Epithelial cell
3BAE2L	ACATGCAGTCTTTATC-1_1	4-Fibroblast
3BAE2L	ACATGCAGTGTCCGTG-1_1	2-Epithelial cell
3BAE2L	ACATGCATCAATCTTC-1_1	6-Macrophage
3BAE2L	ACATGCATCGCAGTTA-1_1	3-Epithelial cell
3BAE2L	ACATTTCAGAGAACCC-1_1	9-Fibroblast
3BAE2L	ACATTTCAGTTTCAGC-1_1	9-Fibroblast
3BAE2L	ACATTTCGTTGATCGT-1_1	5-T cell
3BAE2L	ACATTTCTCACACCGG-1_1	15-Empty/Epithelial cell
3BAE2L	ACATTTCTCGTAGTCA-1_1	2-Epithelial cell
3BAE2L	ACATTTCTCTCATTAC-1_1	9-Fibroblast
3BAE2L	ACCAAACAGAGATCGC-1_1	4-Fibroblast
3BAE2L	ACCAAACCAACCGTGC-1_1	9-Fibroblast
3BAE2L	ACCAAACCAACGGCTC-1_1	4-Fibroblast
3BAE2L	ACCAAACGTATACCTG-1_1	14-Endothelial cell
3BAE2L	ACCAAACGTCCAAGAG-1_1	12-NK cell
3BAE2L	ACCAAACGTTGACTAC-1_1	3-Epithelial cell
3BAE2L	ACCAAACGTTGCATGT-1_1	5-T cell
3BAE2L	ACCAAACTCATCCTGC-1_1	5-T cell
3BAE2L	ACCAACAAGAGAGTTT-1_1	4-Fibroblast
3BAE2L	ACCAACAAGGCAGGTT-1_1	4-Fibroblast
3BAE2L	ACCAACACAATAGGAT-1_1	3-Epithelial cell
3BAE2L	ACCAACACACAAGTTC-1_1	15-Empty/Epithelial cell
3BAE2L	ACCAACACATATGGCT-1_1	14-Endothelial cell
3BAE2L	ACCAACAGTCAGGCAA-1_1	13-Macrophage
3BAE2L	ACCAACAGTCGCCACA-1_1	3-Epithelial cell
3BAE2L	ACCAACAGTTACGGAG-1_1	3-Epithelial cell
3BAE2L	ACCACAAAGCCATATC-1_1	14-Endothelial cell
3BAE2L	ACCACAAAGCTAGTTC-1_1	6-Macrophage
3BAE2L	ACCACAAAGGTAAGAG-1_1	14-Endothelial cell
3BAE2L	ACCACAAAGTACTGTC-1_1	3-Epithelial cell
3BAE2L	ACCACAACAATCCTAG-1_1	15-Empty/Epithelial cell
3BAE2L	ACCACAACATAGGCGA-1_1	2-Epithelial cell
3BAE2L	ACCACAAGTACGCTAT-1_1	5-T cell
3BAE2L	ACCACAAGTTATGACC-1_1	4-Fibroblast
3BAE2L	ACCACAATCAGCATTG-1_1	2-Epithelial cell
3BAE2L	ACCATTTAGATAACGT-1_1	4-Fibroblast
3BAE2L	ACCATTTAGCATTTCG-1_1	4-Fibroblast
3BAE2L	ACCATTTAGCTTAGTC-1_1	9-Fibroblast
3BAE2L	ACCATTTCAAACTAAG-1_1	2-Epithelial cell
3BAE2L	ACCATTTCAGTGAGCA-1_1	3-Epithelial cell
3BAE2L	ACCATTTTCACAGTGT-1_1	15-Empty/Epithelial cell
3BAE2L	ACCATTTTCAGACAAA-1_1	4-Fibroblast
3BAE2L	ACCATTTTCATTATCC-1_1	9-Fibroblast
3BAE2L	ACCATTTTCTCGGCTT-1_1	3-Epithelial cell
3BAE2L	ACCCAAACAAATGCTC-1_1	12-NK cell
3BAE2L	ACCCAAACACCCATAA-1_1	6-Macrophage
3BAE2L	ACCCAAAGTATGATCC-1_1	14-Endothelial cell
3BAE2L	ACCCAAAGTTCGGTCG-1_1	4-Fibroblast
3BAE2L	ACCCTCACACACCAGC-1_1	3-Epithelial cell
3BAE2L	ACCCTCACAGCAGGAT-1_1	4-Fibroblast
3BAE2L	ACCCTCACATCCGTGG-1_1	5-T cell
3BAE2L	ACCCTCAGTACAAACA-1_1	3-Epithelial cell
3BAE2L	ACCCTCAGTGAGCGAT-1_1	2-Epithelial cell
3BAE2L	ACCCTCAGTGGCCCAT-1_1	3-Epithelial cell
3BAE2L	ACCCTCATCCGCCTAT-1_1	15-Empty/Epithelial cell
3BAE2L	ACCCTCATCTCCACTG-1_1	2-Epithelial cell
3BAE2L	ACCCTTGCAAAGGGTC-1_1	9-Fibroblast
3BAE2L	ACCCTTGCAACGTTAC-1_1	2-Epithelial cell
3BAE2L	ACCCTTGCAATGCTCA-1_1	2-Epithelial cell
3BAE2L	ACCCTTGGTAATGATG-1_1	12-NK cell
3BAE2L	ACCCTTGGTACCGGCT-1_1	2-Epithelial cell
3BAE2L	ACCCTTGGTGAGATCG-1_1	2-Epithelial cell
3BAE2L	ACCCTTGGTTGATGTC-1_1	6-Macrophage
3BAE2L	ACCCTTGTCCACACCT-1_1	3-Epithelial cell
3BAE2L	ACCCTTGTCGTGCTCT-1_1	2-Epithelial cell
3BAE2L	ACCCTTGTCTCACGAA-1_1	6-Macrophage
3BAE2L	ACCCTTGTCTCGGTCT-1_1	2-Epithelial cell
3BAE2L	ACCCTTGTCTGTTCAT-1_1	4-Fibroblast
3BAE2L	ACCCTTGTCTTACCGC-1_1	6-Macrophage
3BAE2L	ACCGTTCAGATGCTTC-1_1	14-Endothelial cell
3BAE2L	ACCGTTCAGCACCGAA-1_1	4-Fibroblast
3BAE2L	ACCGTTCAGTACTCGT-1_1	2-Epithelial cell
3BAE2L	ACCGTTCCAATGTCAC-1_1	6-Macrophage
3BAE2L	ACCGTTCCAGCGTGCT-1_1	5-T cell
3BAE2L	ACCGTTCGTTCGCGTG-1_1	4-Fibroblast
3BAE2L	ACCGTTCTCGAATCCA-1_1	3-Epithelial cell
3BAE2L	ACCTACCGTAGGAGTC-1_1	17-B cell
3BAE2L	ACCTACCGTCGAGCAA-1_1	17-B cell
3BAE2L	ACCTACCGTTGGGAAC-1_1	15-Empty/Epithelial cell
3BAE2L	ACCTACCTCATGAGAA-1_1	4-Fibroblast
3BAE2L	ACCTACCTCATGGCCG-1_1	4-Fibroblast
3BAE2L	ACCTACCTCCCATAAG-1_1	5-T cell
3BAE2L	ACCTACCTCTAGTTCT-1_1	3-Epithelial cell
3BAE2L	ACCTGAAAGAGAAGGT-1_1	3-Epithelial cell
3BAE2L	ACCTGAACACACCTTC-1_1	5-T cell
3BAE2L	ACCTGAACAGATGCGA-1_1	15-Empty/Epithelial cell
3BAE2L	ACCTGAACAGGTTCGC-1_1	6-Macrophage
3BAE2L	ACCTGAAGTGAATTGA-1_1	1-Fibroblast
3BAE2L	ACCTGTCAGGGTCACA-1_1	2-Epithelial cell
3BAE2L	ACCTGTCCAAAGCGTG-1_1	9-Fibroblast
3BAE2L	ACCTGTCCAACACAAA-1_1	5-T cell
3BAE2L	ACCTGTCCACCCTGAG-1_1	14-Endothelial cell
3BAE2L	ACCTGTCCAGATCCTA-1_1	3-Epithelial cell
3BAE2L	ACCTGTCCAGTCGGAA-1_1	9-Fibroblast
3BAE2L	ACCTGTCGTAGCGAGT-1_1	3-Epithelial cell
3BAE2L	ACCTGTCTCACAAGGG-1_1	2-Epithelial cell
3BAE2L	ACCTGTCTCAGTAGGG-1_1	9-Fibroblast
3BAE2L	ACCTGTCTCCGCACTT-1_1	2-Epithelial cell
3BAE2L	ACCTGTCTCTTGTTAC-1_1	17-B cell
3BAE2L	ACGATCAAGTCTTGGT-1_1	5-T cell
3BAE2L	ACGATCACATACATCG-1_1	2-Epithelial cell
3BAE2L	ACGATCATCAGCTTGA-1_1	4-Fibroblast
3BAE2L	ACGATCATCTCACGAA-1_1	15-Empty/Epithelial cell
3BAE2L	ACGATCATCTGATGGT-1_1	2-Epithelial cell
3BAE2L	ACGATGTAGCAGTAAT-1_1	9-Fibroblast
3BAE2L	ACGATGTAGCTGTACT-1_1	3-Epithelial cell
3BAE2L	ACGATGTCACGCTATA-1_1	6-Macrophage
3BAE2L	ACGATGTGTAGCTTGT-1_1	2-Epithelial cell
3BAE2L	ACGATGTGTGAGAACC-1_1	6-Macrophage
3BAE2L	ACGCACGAGCAAGGAA-1_1	6-Macrophage
3BAE2L	ACGCACGAGGTACTGG-1_1	19-Epithelial cell
3BAE2L	ACGCACGAGGTGATAT-1_1	14-Endothelial cell
3BAE2L	ACGCACGCATACAGCT-1_1	6-Macrophage
3BAE2L	ACGCACGGTTAGGAGC-1_1	3-Epithelial cell
3BAE2L	ACGCACGTCATGAGAA-1_1	4-Fibroblast
3BAE2L	ACGCACGTCTCAACGA-1_1	5-T cell
3BAE2L	ACGGAAGCAGCCTACG-1_1	15-Empty/Epithelial cell
3BAE2L	ACGGAAGCATCCGGCA-1_1	14-Endothelial cell
3BAE2L	ACGGAAGGTACCCGAC-1_1	6-Macrophage
3BAE2L	ACGGAAGGTATGAAAC-1_1	3-Epithelial cell
3BAE2L	ACGGAAGGTCGAAGCA-1_1	17-B cell
3BAE2L	ACGGAAGTCACACCCT-1_1	3-Epithelial cell
3BAE2L	ACGGAAGTCGCTCTCA-1_1	19-Epithelial cell
3BAE2L	ACGGAAGTCTAGCATG-1_1	4-Fibroblast
3BAE2L	ACGGGTCAGAAGATCT-1_1	15-Empty/Epithelial cell
3BAE2L	ACGGGTCAGGTATTGA-1_1	3-Epithelial cell
3BAE2L	ACGGGTCCATCTTTCA-1_1	4-Fibroblast
3BAE2L	ACGGGTCGTCTACTGA-1_1	14-Endothelial cell
3BAE2L	ACGGGTCTCATTTCGT-1_1	3-Epithelial cell
3BAE2L	ACGGGTCTCGAACCAT-1_1	5-T cell
3BAE2L	ACGGTCGCAAGGGTCA-1_1	5-T cell
3BAE2L	ACGGTCGGTAGAATGT-1_1	13-Macrophage
3BAE2L	ACGGTCGGTAGTTAGA-1_1	9-Fibroblast
3BAE2L	ACGGTCGGTCTGTAAC-1_1	5-T cell
3BAE2L	ACGGTCGTCGCGTGCA-1_1	15-Empty/Epithelial cell
3BAE2L	ACGGTCGTCTCCCATG-1_1	18-T cell
3BAE2L	ACGGTTAAGAAGGCTC-1_1	6-Macrophage
3BAE2L	ACGGTTAAGCCAGTAG-1_1	6-Macrophage
3BAE2L	ACGGTTACAAGAGCTG-1_1	5-T cell
3BAE2L	ACGGTTACACAACGTT-1_1	4-Fibroblast
3BAE2L	ACGGTTACACCCAAGC-1_1	2-Epithelial cell
3BAE2L	ACGGTTACACGCGGTT-1_1	9-Fibroblast
3BAE2L	ACGGTTACAGGTTCAT-1_1	3-Epithelial cell
3BAE2L	ACGGTTAGTCGAACGA-1_1	6-Macrophage
3BAE2L	ACGGTTATCCATCCGT-1_1	2-Epithelial cell
3BAE2L	ACGGTTATCGGCTGAC-1_1	3-Epithelial cell
3BAE2L	ACGGTTATCTTTCCGG-1_1	3-Epithelial cell
3BAE2L	ACGTAACAGACAGCTG-1_1	4-Fibroblast
3BAE2L	ACGTAACAGGCGCTTC-1_1	5-T cell
3BAE2L	ACGTAACAGGGTACGT-1_1	12-NK cell
3BAE2L	ACGTAACGTCCAATCA-1_1	2-Epithelial cell
3BAE2L	ACGTAACGTTCAACGT-1_1	3-Epithelial cell
3BAE2L	ACGTAACTCGCCGAGT-1_1	12-NK cell
3BAE2L	ACGTAACTCGGTGAAG-1_1	6-Macrophage
3BAE2L	ACGTACACACCTTCGT-1_1	2-Epithelial cell
3BAE2L	ACGTACACATAGCTGT-1_1	19-Epithelial cell
3BAE2L	ACGTACAGTGATAGAT-1_1	4-Fibroblast
3BAE2L	ACGTACAGTGATATAG-1_1	17-B cell
3BAE2L	ACGTACAGTTCACCGG-1_1	6-Macrophage
3BAE2L	ACGTACATCAAGCCTA-1_1	4-Fibroblast
3BAE2L	ACGTACATCCGTAGTA-1_1	3-Epithelial cell
3BAE2L	ACGTAGTAGCCATGCC-1_1	12-NK cell
3BAE2L	ACGTAGTAGTATAGAC-1_1	6-Macrophage
3BAE2L	ACGTAGTAGTCAACAA-1_1	4-Fibroblast
3BAE2L	ACGTAGTCACCCTTAC-1_1	2-Epithelial cell
3BAE2L	ACGTAGTCAGCGCGTT-1_1	15-Empty/Epithelial cell
3BAE2L	ACGTAGTCATCCTTGC-1_1	13-Macrophage
3BAE2L	ACGTAGTGTGCGTCGT-1_1	2-Epithelial cell
3BAE2L	ACGTAGTTCGAGATAA-1_1	14-Endothelial cell
3BAE2L	ACGTCCTAGCGCAATG-1_1	2-Epithelial cell
3BAE2L	ACGTCCTAGTAATCCC-1_1	14-Endothelial cell
3BAE2L	ACGTCCTCAGGCGATA-1_1	3-Epithelial cell
3BAE2L	ACGTCCTCAGGTCCGT-1_1	2-Epithelial cell
3BAE2L	ACGTCCTGTCCACTTC-1_1	9-Fibroblast
3BAE2L	ACGTCCTGTGGCTGCT-1_1	17-B cell
3BAE2L	ACGTCCTTCCAAGAGG-1_1	9-Fibroblast
3BAE2L	ACGTCCTTCCGGACGT-1_1	19-Epithelial cell
3BAE2L	ACGTCCTTCTAAGCCA-1_1	5-T cell
3BAE2L	ACGTTCCAGCCATTGT-1_1	5-T cell
3BAE2L	ACGTTCCAGCGTGTTT-1_1	6-Macrophage
3BAE2L	ACGTTCCAGCTTCATG-1_1	2-Epithelial cell
3BAE2L	ACGTTCCCAAACTGCT-1_1	4-Fibroblast
3BAE2L	ACGTTCCCACACCGAC-1_1	9-Fibroblast
3BAE2L	ACGTTCCCACAGTACT-1_1	4-Fibroblast
3BAE2L	ACGTTCCCACCGGTCA-1_1	13-Macrophage
3BAE2L	ACGTTCCCAGCCGTCA-1_1	4-Fibroblast
3BAE2L	ACGTTCCCAGTCAGAG-1_1	17-B cell
3BAE2L	ACGTTCCCATTGACCA-1_1	2-Epithelial cell
3BAE2L	ACGTTCCGTATCAAGA-1_1	5-T cell
3BAE2L	ACGTTCCTCGACGTCG-1_1	6-Macrophage
3BAE2L	ACGTTCCTCTACGCAA-1_1	5-T cell
3BAE2L	ACTACGAAGCGGTATG-1_1	3-Epithelial cell
3BAE2L	ACTACGAAGTATAACG-1_1	9-Fibroblast
3BAE2L	ACTACGACAACGCATT-1_1	3-Epithelial cell
3BAE2L	ACTACGAGTACCTTCC-1_1	2-Epithelial cell
3BAE2L	ACTACGATCCGCTTAC-1_1	5-T cell
3BAE2L	ACTACGATCCGGGACT-1_1	2-Epithelial cell
3BAE2L	ACTATCTAGGATATGT-1_1	12-NK cell
3BAE2L	ACTATCTAGTGTGTTC-1_1	3-Epithelial cell
3BAE2L	ACTATCTCAAGGCGTA-1_1	6-Macrophage
3BAE2L	ACTATCTCACCCAATA-1_1	6-Macrophage
3BAE2L	ACTATCTCACGTCGGT-1_1	4-Fibroblast
3BAE2L	ACTATCTCAGGTAGTG-1_1	13-Macrophage
3BAE2L	ACTATCTTCATTACGG-1_1	9-Fibroblast
3BAE2L	ACTATGGAGACGCAGT-1_1	14-Endothelial cell
3BAE2L	ACTATGGAGCACTCCG-1_1	2-Epithelial cell
3BAE2L	ACTATGGAGTCAGCGA-1_1	14-Endothelial cell
3BAE2L	ACTATGGGTACTCAAC-1_1	9-Fibroblast
3BAE2L	ACTATGGGTAGATCGG-1_1	18-T cell
3BAE2L	ACTATTCAGAGCATCG-1_1	17-B cell
3BAE2L	ACTATTCAGGAATTAC-1_1	4-Fibroblast
3BAE2L	ACTATTCAGGGTCTTT-1_1	12-NK cell
3BAE2L	ACTATTCCAAGCAGGT-1_1	2-Epithelial cell
3BAE2L	ACTATTCGTCTTGAGT-1_1	3-Epithelial cell
3BAE2L	ACTATTCTCCACGTGG-1_1	6-Macrophage
3BAE2L	ACTCCCAAGAGCATAT-1_1	4-Fibroblast
3BAE2L	ACTCCCAAGCATGCAG-1_1	3-Epithelial cell
3BAE2L	ACTCCCACAGAGTTCT-1_1	9-Fibroblast
3BAE2L	ACTCCCACATCCGAAT-1_1	4-Fibroblast
3BAE2L	ACTCCCATCACGGAGA-1_1	4-Fibroblast
3BAE2L	ACTCCCATCGAAGGAC-1_1	5-T cell
3BAE2L	ACTCCCATCGGAAACG-1_1	18-T cell
3BAE2L	ACTCTCGAGACTTCGT-1_1	2-Epithelial cell
3BAE2L	ACTCTCGCACCTGAAT-1_1	12-NK cell
3BAE2L	ACTCTCGCATGGAACG-1_1	3-Epithelial cell
3BAE2L	ACTCTCGCATTGGGAG-1_1	2-Epithelial cell
3BAE2L	ACTCTCGGTAGGTACG-1_1	2-Epithelial cell
3BAE2L	ACTCTCGGTGATTCTG-1_1	3-Epithelial cell
3BAE2L	ACTCTCGTCATGCAGT-1_1	2-Epithelial cell
3BAE2L	ACTCTCGTCCAGCACG-1_1	3-Epithelial cell
3BAE2L	ACTGATGAGATTGAGT-1_1	3-Epithelial cell
3BAE2L	ACTGATGCAGGAATCG-1_1	6-Macrophage
3BAE2L	ACTGATGGTAACTAAG-1_1	14-Endothelial cell
3BAE2L	ACTGATGGTCCACAGC-1_1	2-Epithelial cell
3BAE2L	ACTGATGGTGCTATTG-1_1	6-Macrophage
3BAE2L	ACTGATGTCAAGAAAC-1_1	18-T cell
3BAE2L	ACTGCAAAGAAACTGT-1_1	15-Empty/Epithelial cell
3BAE2L	ACTGCAACAAGACGAC-1_1	5-T cell
3BAE2L	ACTGCAACACTAGGCC-1_1	17-B cell
3BAE2L	ACTGCAATCAACTGAC-1_1	6-Macrophage
3BAE2L	ACTGCAATCCCGAACG-1_1	14-Endothelial cell
3BAE2L	ACTGCAATCTCGAACA-1_1	5-T cell
3BAE2L	ACTGTCCAGTGCACAG-1_1	6-Macrophage
3BAE2L	ACTGTCCAGTTGTAAG-1_1	9-Fibroblast
3BAE2L	ACTGTCCCAATCCTAG-1_1	2-Epithelial cell
3BAE2L	ACTGTCCGTAGGAAAG-1_1	3-Epithelial cell
3BAE2L	ACTGTCCGTCTTCCGT-1_1	19-Epithelial cell
3BAE2L	ACTGTCCTCAAGGACG-1_1	3-Epithelial cell
3BAE2L	ACTGTGAAGCAAATCA-1_1	17-B cell
3BAE2L	ACTGTGAAGGCATGGT-1_1	19-Epithelial cell
3BAE2L	ACTGTGACAAGCTCTA-1_1	15-Empty/Epithelial cell
3BAE2L	ACTGTGACACTAAACC-1_1	4-Fibroblast
3BAE2L	ACTGTGACAGTAGAGC-1_1	2-Epithelial cell
3BAE2L	ACTGTGACATAGGTAA-1_1	3-Epithelial cell
3BAE2L	ACTGTGAGTACGTGAG-1_1	17-B cell
3BAE2L	ACTGTGAGTCTAGTGT-1_1	3-Epithelial cell
3BAE2L	ACTGTGAGTGTAAATG-1_1	13-Macrophage
3BAE2L	ACTGTGAGTTTCAGAC-1_1	9-Fibroblast
3BAE2L	ACTGTGATCCTTATGT-1_1	6-Macrophage
3BAE2L	ACTTAGGAGACGGAAA-1_1	12-NK cell
3BAE2L	ACTTAGGAGTTGGAAT-1_1	4-Fibroblast
3BAE2L	ACTTAGGCACGCTATA-1_1	6-Macrophage
3BAE2L	ACTTAGGCAGAGTAAT-1_1	13-Macrophage
3BAE2L	ACTTAGGCAGATCCTA-1_1	2-Epithelial cell
3BAE2L	ACTTAGGGTCCTGGTG-1_1	12-NK cell
3BAE2L	ACTTAGGGTTTAGAGA-1_1	6-Macrophage
3BAE2L	ACTTAGGTCAGACCCG-1_1	5-T cell
3BAE2L	ACTTAGGTCCGTAGGC-1_1	5-T cell
3BAE2L	ACTTAGGTCCTAAACG-1_1	3-Epithelial cell
3BAE2L	ACTTAGGTCTGATGGT-1_1	18-T cell
3BAE2L	ACTTATCAGGTTCATC-1_1	9-Fibroblast
3BAE2L	ACTTATCAGTTCCGTA-1_1	4-Fibroblast
3BAE2L	ACTTATCCATCGATCA-1_1	12-NK cell
3BAE2L	ACTTATCGTCTCCTGT-1_1	6-Macrophage
3BAE2L	ACTTATCGTGTCGCTG-1_1	2-Epithelial cell
3BAE2L	ACTTATCTCACTCGAA-1_1	4-Fibroblast
3BAE2L	ACTTCCGAGAGAACCC-1_1	15-Empty/Epithelial cell
3BAE2L	ACTTCCGAGCTGAGTG-1_1	2-Epithelial cell
3BAE2L	ACTTCCGAGGAGATAG-1_1	9-Fibroblast
3BAE2L	ACTTCCGCAGCGGTTC-1_1	4-Fibroblast
3BAE2L	ACTTCCGGTTAGCGGA-1_1	6-Macrophage
3BAE2L	ACTTCCGTCCCTCTCC-1_1	2-Epithelial cell
3BAE2L	ACTTCGCAGGTCGACA-1_1	3-Epithelial cell
3BAE2L	ACTTCGCAGTGTTCCA-1_1	3-Epithelial cell
3BAE2L	ACTTCGCCACCTCAGG-1_1	19-Epithelial cell
3BAE2L	ACTTCGCCATCTCATT-1_1	3-Epithelial cell
3BAE2L	ACTTCGCGTAGTGTGG-1_1	17-B cell
3BAE2L	ACTTCGCGTCATAGTC-1_1	5-T cell
3BAE2L	ACTTCGCTCATTTGCT-1_1	4-Fibroblast
3BAE2L	ACTTCGCTCCTCACCA-1_1	4-Fibroblast
3BAE2L	ACTTCGCTCTAAGGAA-1_1	12-NK cell
3BAE2L	ACTTCGCTCTCATTGT-1_1	2-Epithelial cell
3BAE2L	ACTTTCAAGAGAAGGT-1_1	14-Endothelial cell
3BAE2L	ACTTTCAAGGAGATAG-1_1	5-T cell
3BAE2L	ACTTTCAAGGCATGCA-1_1	4-Fibroblast
3BAE2L	ACTTTCAAGGTGCAGT-1_1	4-Fibroblast
3BAE2L	ACTTTCACACGACAAG-1_1	4-Fibroblast
3BAE2L	ACTTTCACAGCGAGTA-1_1	18-T cell
3BAE2L	ACTTTCAGTAACGGTG-1_1	6-Macrophage
3BAE2L	ACTTTCATCCACCTGT-1_1	18-T cell
3BAE2L	ACTTTGTAGTCATGCT-1_1	6-Macrophage
3BAE2L	ACTTTGTCAAGCACCC-1_1	14-Endothelial cell
3BAE2L	ACTTTGTCAAGTTCGT-1_1	15-Empty/Epithelial cell
3BAE2L	ACTTTGTCAATTTCCT-1_1	12-NK cell
3BAE2L	ACTTTGTCACGGAAGT-1_1	4-Fibroblast
3BAE2L	ACTTTGTCAGAGGGTT-1_1	12-NK cell
3BAE2L	ACTTTGTTCAGCCTTC-1_1	5-T cell
3BAE2L	ACTTTGTTCCGTAATG-1_1	13-Macrophage
3BAE2L	ACTTTGTTCGCGCTGA-1_1	6-Macrophage
3BAE2L	AGAAATGAGACCTTTG-1_1	5-T cell
3BAE2L	AGAAATGAGATTTGCC-1_1	6-Macrophage
3BAE2L	AGAAATGAGCATGCAG-1_1	17-B cell
3BAE2L	AGAAATGAGCTCACTA-1_1	9-Fibroblast
3BAE2L	AGAAATGCAGTTAGAA-1_1	9-Fibroblast
3BAE2L	AGAAATGGTAGAGGAA-1_1	18-T cell
3BAE2L	AGAAATGTCATCCTGC-1_1	21-T cell
3BAE2L	AGAAATGTCGTCCTTG-1_1	9-Fibroblast
3BAE2L	AGAACAAAGTGTTCCA-1_1	2-Epithelial cell
3BAE2L	AGAACAACAAATCAGA-1_1	12-NK cell
3BAE2L	AGAACAACAGCTATTG-1_1	2-Epithelial cell
3BAE2L	AGAACAACAGGCTCTG-1_1	19-Epithelial cell
3BAE2L	AGAACAAGTCGAATTC-1_1	14-Endothelial cell
3BAE2L	AGAACAATCGAGAACG-1_1	12-NK cell
3BAE2L	AGAACCTAGGTGATCG-1_1	2-Epithelial cell
3BAE2L	AGAACCTCACTTCCTG-1_1	4-Fibroblast
3BAE2L	AGAACCTCACTTGTCC-1_1	4-Fibroblast
3BAE2L	AGAACCTCAGATCCTA-1_1	3-Epithelial cell
3BAE2L	AGAACCTCATAGACTC-1_1	19-Epithelial cell
3BAE2L	AGAACCTGTATGCAAA-1_1	3-Epithelial cell
3BAE2L	AGAACCTTCTAACACG-1_1	18-T cell
3BAE2L	AGAACCTTCTGAATCG-1_1	20-Macrophage
3BAE2L	AGAAGCGAGCGAGTAC-1_1	2-Epithelial cell
3BAE2L	AGAAGCGCAAGAAATC-1_1	2-Epithelial cell
3BAE2L	AGAAGCGCATTCAGCA-1_1	5-T cell
3BAE2L	AGAAGCGGTCGTGATT-1_1	4-Fibroblast
3BAE2L	AGAAGCGGTCTCTCAC-1_1	3-Epithelial cell
3BAE2L	AGAAGTAAGATCCGAG-1_1	13-Macrophage
3BAE2L	AGAAGTAAGGTCCCGT-1_1	12-NK cell
3BAE2L	AGAAGTAAGTTGCATC-1_1	2-Epithelial cell
3BAE2L	AGAAGTACAGTCAGAG-1_1	21-T cell
3BAE2L	AGAAGTAGTACCCAGC-1_1	14-Endothelial cell
3BAE2L	AGAAGTAGTCTGTGAT-1_1	5-T cell
3BAE2L	AGAAGTAGTTGCATTG-1_1	15-Empty/Epithelial cell
3BAE2L	AGAAGTATCCGCGAGT-1_1	3-Epithelial cell
3BAE2L	AGAAGTATCGACCACG-1_1	4-Fibroblast
3BAE2L	AGACAAAAGTATAGAC-1_1	6-Macrophage
3BAE2L	AGACAAACAAGGTCTT-1_1	2-Epithelial cell
3BAE2L	AGACAAATCCATAGAC-1_1	15-Empty/Epithelial cell
3BAE2L	AGACAAATCGCAGAGA-1_1	4-Fibroblast
3BAE2L	AGACACTAGGATGTTA-1_1	2-Epithelial cell
3BAE2L	AGACACTCACGGCTAC-1_1	2-Epithelial cell
3BAE2L	AGACACTCAGTGGTGA-1_1	3-Epithelial cell
3BAE2L	AGACACTGTAACTTCG-1_1	12-NK cell
3BAE2L	AGACACTGTATAGCTC-1_1	2-Epithelial cell
3BAE2L	AGACACTGTGATACAA-1_1	14-Endothelial cell
3BAE2L	AGACACTGTGCGAACA-1_1	4-Fibroblast
3BAE2L	AGACACTTCCGTACGG-1_1	4-Fibroblast
3BAE2L	AGACACTTCGTTCATT-1_1	12-NK cell
3BAE2L	AGACAGGAGGTCCAGA-1_1	3-Epithelial cell
3BAE2L	AGACAGGCAACAGCCC-1_1	6-Macrophage
3BAE2L	AGACAGGCACCTGCTT-1_1	4-Fibroblast
3BAE2L	AGACAGGCATCGTTCC-1_1	9-Fibroblast
3BAE2L	AGACAGGGTACTGCCG-1_1	6-Macrophage
3BAE2L	AGACAGGTCGCCAACG-1_1	3-Epithelial cell
3BAE2L	AGACAGGTCGGTTAGT-1_1	9-Fibroblast
3BAE2L	AGACCATAGGTCCCTG-1_1	2-Epithelial cell
3BAE2L	AGACCATAGTCATACC-1_1	4-Fibroblast
3BAE2L	AGACCATCACGGCACT-1_1	4-Fibroblast
3BAE2L	AGACCATTCCTGTTAT-1_1	9-Fibroblast
3BAE2L	AGACCCGAGAGTGGCT-1_1	18-T cell
3BAE2L	AGACCCGAGCATGAAT-1_1	14-Endothelial cell
3BAE2L	AGACCCGAGGTGCCTC-1_1	2-Epithelial cell
3BAE2L	AGACCCGAGTACTCGT-1_1	4-Fibroblast
3BAE2L	AGACCCGCACGGGTAA-1_1	4-Fibroblast
3BAE2L	AGACCCGCAGCATTGT-1_1	6-Macrophage
3BAE2L	AGACCCGCATAACAGA-1_1	12-NK cell
3BAE2L	AGACCCGTCCGATTAG-1_1	6-Macrophage
3BAE2L	AGACCCGTCCTGATAG-1_1	6-Macrophage
3BAE2L	AGACCCGTCGTAACAC-1_1	2-Epithelial cell
3BAE2L	AGACCCGTCTAGTACG-1_1	3-Epithelial cell
3BAE2L	AGACTCAAGGCGTTGA-1_1	15-Empty/Epithelial cell
3BAE2L	AGACTCACACGGTCTG-1_1	5-T cell
3BAE2L	AGACTCACACTTCTCG-1_1	9-Fibroblast
3BAE2L	AGACTCACAGGGATAC-1_1	3-Epithelial cell
3BAE2L	AGACTCAGTCGAAGCA-1_1	5-T cell
3BAE2L	AGACTCAGTGCGAACA-1_1	15-Empty/Epithelial cell
3BAE2L	AGACTCATCTTCTGGC-1_1	14-Endothelial cell
3BAE2L	AGAGAATAGACTTAAG-1_1	2-Epithelial cell
3BAE2L	AGAGAATAGAGCATAT-1_1	2-Epithelial cell
3BAE2L	AGAGAATAGCTGTCCG-1_1	3-Epithelial cell
3BAE2L	AGAGAATAGGAACGAA-1_1	5-T cell
3BAE2L	AGAGAATAGTCCTGCG-1_1	19-Epithelial cell
3BAE2L	AGAGAATGTCTACACA-1_1	2-Epithelial cell
3BAE2L	AGAGAATTCTATGTGG-1_1	2-Epithelial cell
3BAE2L	AGAGAGCAGCACGTCC-1_1	4-Fibroblast
3BAE2L	AGAGAGCAGCTAAATG-1_1	5-T cell
3BAE2L	AGAGAGCAGGCAGGGA-1_1	4-Fibroblast
3BAE2L	AGAGAGCAGTGCACCC-1_1	9-Fibroblast
3BAE2L	AGAGAGCCAAGCCCAC-1_1	2-Epithelial cell
3BAE2L	AGAGAGCCACAGAGAC-1_1	6-Macrophage
3BAE2L	AGAGAGCCACGTAGAG-1_1	2-Epithelial cell
3BAE2L	AGAGAGCCATCACCAA-1_1	19-Epithelial cell
3BAE2L	AGAGAGCCATCCTAAG-1_1	2-Epithelial cell
3BAE2L	AGAGAGCTCGAGAAGC-1_1	14-Endothelial cell
3BAE2L	AGAGAGCTCGGAACTT-1_1	4-Fibroblast
3BAE2L	AGAGCAGAGACATCAA-1_1	3-Epithelial cell
3BAE2L	AGAGCAGAGGTTAAAC-1_1	3-Epithelial cell
3BAE2L	AGAGCAGCAACGCATT-1_1	3-Epithelial cell
3BAE2L	AGAGCAGCAAGCACCC-1_1	15-Empty/Epithelial cell
3BAE2L	AGAGCAGCATATTCGG-1_1	4-Fibroblast
3BAE2L	AGAGCAGGTACGCTAT-1_1	4-Fibroblast
3BAE2L	AGAGCAGGTGACAGGT-1_1	3-Epithelial cell
3BAE2L	AGAGCAGGTTTCACAG-1_1	9-Fibroblast
3BAE2L	AGAGCCCAGAGTATAC-1_1	6-Macrophage
3BAE2L	AGAGCCCAGGTAGCCA-1_1	4-Fibroblast
3BAE2L	AGAGCCCAGTTGGGAC-1_1	5-T cell
3BAE2L	AGAGCCCCAATTTCCT-1_1	17-B cell
3BAE2L	AGAGCCCTCAGCCTCT-1_1	13-Macrophage
3BAE2L	AGAGCCCTCCTGCCAT-1_1	15-Empty/Epithelial cell
3BAE2L	AGATAGAAGTGACACG-1_1	6-Macrophage
3BAE2L	AGATAGACAAGCTGTT-1_1	2-Epithelial cell
3BAE2L	AGATAGACAATGACCT-1_1	4-Fibroblast
3BAE2L	AGATAGACACCTCTGT-1_1	9-Fibroblast
3BAE2L	AGATAGACAGATCACT-1_1	6-Macrophage
3BAE2L	AGATAGATCAATCCGA-1_1	6-Macrophage
3BAE2L	AGATAGATCATCCCGT-1_1	3-Epithelial cell
3BAE2L	AGATAGATCGGTGCAC-1_1	13-Macrophage
3BAE2L	AGATAGATCTATTCGT-1_1	6-Macrophage
3BAE2L	AGATCCAAGGCCTTGC-1_1	4-Fibroblast
3BAE2L	AGATCCAAGTAGACAT-1_1	19-Epithelial cell
3BAE2L	AGATCCACAGGATCTT-1_1	5-T cell
3BAE2L	AGATCCAGTAACGATA-1_1	4-Fibroblast
3BAE2L	AGATCCAGTCAGCTTA-1_1	5-T cell
3BAE2L	AGATCCAGTGCAGTGA-1_1	4-Fibroblast
3BAE2L	AGATCCATCGAAGCAG-1_1	4-Fibroblast
3BAE2L	AGATCGTAGAGTTGCG-1_1	4-Fibroblast
3BAE2L	AGATCGTAGCACAAAT-1_1	5-T cell
3BAE2L	AGATCGTAGGATATAC-1_1	15-Empty/Epithelial cell
3BAE2L	AGATCGTAGTTTAGGA-1_1	4-Fibroblast
3BAE2L	AGATCGTCACAACATC-1_1	5-T cell
3BAE2L	AGATCGTCACAAGTGG-1_1	5-T cell
3BAE2L	AGATCGTCATCTTTCA-1_1	19-Epithelial cell
3BAE2L	AGATCGTGTGGCTGAA-1_1	12-NK cell
3BAE2L	AGATCGTTCATTGGTG-1_1	5-T cell
3BAE2L	AGATGAAAGCTGGCTC-1_1	12-NK cell
3BAE2L	AGATGAAAGGACTGGT-1_1	4-Fibroblast
3BAE2L	AGATGAAAGGCAGCTA-1_1	4-Fibroblast
3BAE2L	AGATGAAAGGTTCATC-1_1	3-Epithelial cell
3BAE2L	AGATGAAAGTAGGATT-1_1	15-Empty/Epithelial cell
3BAE2L	AGATGAACACCCTCTA-1_1	3-Epithelial cell
3BAE2L	AGATGAACACCTATCC-1_1	2-Epithelial cell
3BAE2L	AGATGAACAGTCTTCC-1_1	4-Fibroblast
3BAE2L	AGATGAAGTAAGAACT-1_1	4-Fibroblast
3BAE2L	AGATGAAGTGGCAACA-1_1	5-T cell
3BAE2L	AGATGAATCTACGGTA-1_1	13-Macrophage
3BAE2L	AGATGCTAGAGGATGA-1_1	6-Macrophage
3BAE2L	AGATGCTAGGGCGAAG-1_1	6-Macrophage
3BAE2L	AGATGCTAGGTCATTC-1_1	12-NK cell
3BAE2L	AGATGCTCACAACGCC-1_1	4-Fibroblast
3BAE2L	AGATGCTCATATCGGT-1_1	17-B cell
3BAE2L	AGATGCTGTCGTTCAA-1_1	15-Empty/Epithelial cell
3BAE2L	AGATGCTTCCCAGGCA-1_1	3-Epithelial cell
3BAE2L	AGATGCTTCTAGCAAC-1_1	2-Epithelial cell
3BAE2L	AGATGCTTCTCAGTCC-1_1	12-NK cell
3BAE2L	AGCATCAAGAAGTCCG-1_1	12-NK cell
3BAE2L	AGCATCAGTGTACATC-1_1	2-Epithelial cell
3BAE2L	AGCATCAGTGTTTGCA-1_1	2-Epithelial cell
3BAE2L	AGCATCAGTTGGGTAG-1_1	4-Fibroblast
3BAE2L	AGCATCATCAACTACG-1_1	13-Macrophage
3BAE2L	AGCATCATCGTGAGAG-1_1	19-Epithelial cell
3BAE2L	AGCATCATCTCCCATG-1_1	15-Empty/Epithelial cell
3BAE2L	AGCCAATAGCATATGA-1_1	20-Macrophage
3BAE2L	AGCCAATCAGGCTCTG-1_1	4-Fibroblast
3BAE2L	AGCCAATTCCAGCACG-1_1	6-Macrophage
3BAE2L	AGCCAATTCCTGATAG-1_1	2-Epithelial cell
3BAE2L	AGCCAATTCTGTGTGA-1_1	2-Epithelial cell
3BAE2L	AGCCACGCACTTCAAG-1_1	4-Fibroblast
3BAE2L	AGCCACGCAGATCACT-1_1	22-Fibroblast
3BAE2L	AGCCACGTCTGATGGT-1_1	2-Epithelial cell
3BAE2L	AGCCACGTCTGGGCGT-1_1	14-Endothelial cell
3BAE2L	AGCCAGCAGACTAGAT-1_1	9-Fibroblast
3BAE2L	AGCCAGCAGGTTAGTA-1_1	9-Fibroblast
3BAE2L	AGCCAGCAGTCGAAAT-1_1	3-Epithelial cell
3BAE2L	AGCCAGCAGTCGAAGC-1_1	15-Empty/Epithelial cell
3BAE2L	AGCCAGCCATGACACT-1_1	14-Endothelial cell
3BAE2L	AGCCAGCCATGACGTT-1_1	3-Epithelial cell
3BAE2L	AGCCAGCGTCTCTCAC-1_1	3-Epithelial cell
3BAE2L	AGCCAGCGTTCAAGTC-1_1	4-Fibroblast
3BAE2L	AGCCAGCGTTCCGTTC-1_1	5-T cell
3BAE2L	AGCCAGCTCTGTACAG-1_1	5-T cell
3BAE2L	AGCGATTAGCCATTTG-1_1	2-Epithelial cell
3BAE2L	AGCGATTAGGGCAGAG-1_1	2-Epithelial cell
3BAE2L	AGCGATTAGTTTGAGA-1_1	4-Fibroblast
3BAE2L	AGCGATTCAGCTACCG-1_1	4-Fibroblast
3BAE2L	AGCGATTGTAGGTTTC-1_1	2-Epithelial cell
3BAE2L	AGCGATTTCCCTTGTG-1_1	6-Macrophage
3BAE2L	AGCGATTTCCGCTTAC-1_1	4-Fibroblast
3BAE2L	AGCGCCAAGAAGTCCG-1_1	14-Endothelial cell
3BAE2L	AGCGCCACACTGCGTG-1_1	15-Empty/Epithelial cell
3BAE2L	AGCGCCAGTTCTGAGT-1_1	3-Epithelial cell
3BAE2L	AGCGCCATCAAACCCA-1_1	2-Epithelial cell
3BAE2L	AGCGCCATCCATGAGT-1_1	2-Epithelial cell
3BAE2L	AGCGCTGAGATCCTAC-1_1	23-Macrophage
3BAE2L	AGCGCTGAGCACCGAA-1_1	14-Endothelial cell
3BAE2L	AGCGCTGAGTCATTGC-1_1	14-Endothelial cell
3BAE2L	AGCGCTGCAAACCACT-1_1	17-B cell
3BAE2L	AGCGCTGCACTCAGAT-1_1	4-Fibroblast
3BAE2L	AGCGCTGGTCGAATGG-1_1	2-Epithelial cell
3BAE2L	AGCGCTGTCTATGTGG-1_1	6-Macrophage
3BAE2L	AGCGTATAGCGCCCAT-1_1	2-Epithelial cell
3BAE2L	AGCGTATAGGACACTG-1_1	9-Fibroblast
3BAE2L	AGCGTATAGGCTGGAT-1_1	15-Empty/Epithelial cell
3BAE2L	AGCGTATAGGTCTTTG-1_1	23-Macrophage
3BAE2L	AGCGTATCACGTCGTG-1_1	3-Epithelial cell
3BAE2L	AGCGTATGTAGTCCTA-1_1	3-Epithelial cell
3BAE2L	AGCGTATGTCCCGTGA-1_1	4-Fibroblast
3BAE2L	AGCGTATTCCAACCAA-1_1	5-T cell
3BAE2L	AGCGTATTCGTTTACT-1_1	3-Epithelial cell
3BAE2L	AGCGTCGCATGCGGTC-1_1	2-Epithelial cell
3BAE2L	AGCGTCGGTTTGACAC-1_1	2-Epithelial cell
3BAE2L	AGCGTCGTCTCGTCAC-1_1	9-Fibroblast
3BAE2L	AGCTACAAGGACTTCT-1_1	2-Epithelial cell
3BAE2L	AGCTACAAGTGGATAT-1_1	2-Epithelial cell
3BAE2L	AGCTACACACTCAAGT-1_1	2-Epithelial cell
3BAE2L	AGCTACAGTAAGCAAT-1_1	4-Fibroblast
3BAE2L	AGCTACAGTACAGTAA-1_1	18-T cell
3BAE2L	AGCTACATCACGGGAA-1_1	3-Epithelial cell
3BAE2L	AGCTACATCGAGTCTA-1_1	5-T cell
3BAE2L	AGCTCAAAGCATAGGC-1_1	15-Empty/Epithelial cell
3BAE2L	AGCTCAAAGCGCCGTT-1_1	9-Fibroblast
3BAE2L	AGCTCAACAACCTAAC-1_1	2-Epithelial cell
3BAE2L	AGCTCAACAAGCGCTC-1_1	2-Epithelial cell
3BAE2L	AGCTCAACAGTCAGTT-1_1	4-Fibroblast
3BAE2L	AGCTCAAGTAATGCTC-1_1	2-Epithelial cell
3BAE2L	AGCTCAAGTCTGATAC-1_1	2-Epithelial cell
3BAE2L	AGCTTCCAGCTACAAA-1_1	3-Epithelial cell
3BAE2L	AGCTTCCAGTGAGGTC-1_1	17-B cell
3BAE2L	AGCTTCCCACGACTAT-1_1	15-Empty/Epithelial cell
3BAE2L	AGCTTCCGTCCCTGAG-1_1	2-Epithelial cell
3BAE2L	AGCTTCCGTGGGTTGA-1_1	12-NK cell
3BAE2L	AGCTTCCGTTCGTGCG-1_1	5-T cell
3BAE2L	AGCTTCCGTTTCGTTT-1_1	6-Macrophage
3BAE2L	AGCTTCCTCACCTCGT-1_1	3-Epithelial cell
3BAE2L	AGGAAATAGCGACTGA-1_1	12-NK cell
3BAE2L	AGGAAATAGTCTTCCC-1_1	4-Fibroblast
3BAE2L	AGGAAATCAACGCCCA-1_1	4-Fibroblast
3BAE2L	AGGAAATCATCGGAAG-1_1	4-Fibroblast
3BAE2L	AGGAAATCATTCATCT-1_1	2-Epithelial cell
3BAE2L	AGGAAATTCGGCTGTG-1_1	6-Macrophage
3BAE2L	AGGAATACAGCTTTGA-1_1	19-Epithelial cell
3BAE2L	AGGAATAGTCCATCTC-1_1	3-Epithelial cell
3BAE2L	AGGAATAGTGGTTTAC-1_1	2-Epithelial cell
3BAE2L	AGGAATATCAAGTCTG-1_1	5-T cell
3BAE2L	AGGAATATCAGCTCTC-1_1	3-Epithelial cell
3BAE2L	AGGAATATCTGGCCGA-1_1	9-Fibroblast
3BAE2L	AGGAATATCTTCCCAG-1_1	15-Empty/Epithelial cell
3BAE2L	AGGAATATCTTCGGAA-1_1	2-Epithelial cell
3BAE2L	AGGACGAAGAATTGTG-1_1	9-Fibroblast
3BAE2L	AGGACGAAGGTGGCTA-1_1	5-T cell
3BAE2L	AGGACGAAGTAGCTCT-1_1	3-Epithelial cell
3BAE2L	AGGACGACACAAGTTC-1_1	5-T cell
3BAE2L	AGGACGATCACAATGC-1_1	2-Epithelial cell
3BAE2L	AGGACTTAGTCATACC-1_1	2-Epithelial cell
3BAE2L	AGGACTTCACAATGTC-1_1	5-T cell
3BAE2L	AGGACTTCAGCACAGA-1_1	2-Epithelial cell
3BAE2L	AGGACTTGTCGCTCGA-1_1	4-Fibroblast
3BAE2L	AGGACTTTCGGCATAT-1_1	6-Macrophage
3BAE2L	AGGAGGTCAAATACGA-1_1	2-Epithelial cell
3BAE2L	AGGAGGTGTAATTGGA-1_1	2-Epithelial cell
3BAE2L	AGGAGGTGTGCCTATA-1_1	6-Macrophage
3BAE2L	AGGAGGTTCGGACTTA-1_1	14-Endothelial cell
3BAE2L	AGGAGGTTCGGCACTG-1_1	9-Fibroblast
3BAE2L	AGGATAACAAGACCGA-1_1	3-Epithelial cell
3BAE2L	AGGATAAGTACTGGGA-1_1	5-T cell
3BAE2L	AGGATAAGTGATGAAT-1_1	4-Fibroblast
3BAE2L	AGGATAATCAGACCTA-1_1	3-Epithelial cell
3BAE2L	AGGATAATCATGCGGC-1_1	3-Epithelial cell
3BAE2L	AGGATAATCCTACGGG-1_1	6-Macrophage
3BAE2L	AGGATAATCGCTACGG-1_1	5-T cell
3BAE2L	AGGATAATCGGATAAA-1_1	17-B cell
3BAE2L	AGGATCTCAGGACATG-1_1	17-B cell
3BAE2L	AGGATCTCAGTGTACT-1_1	2-Epithelial cell
3BAE2L	AGGATCTTCGCACGAC-1_1	4-Fibroblast
3BAE2L	AGGATCTTCGTAGAGG-1_1	5-T cell
3BAE2L	AGGCATTAGATTCGCT-1_1	19-Epithelial cell
3BAE2L	AGGCATTAGGATTTAG-1_1	12-NK cell
3BAE2L	AGGCATTAGGTTACAA-1_1	15-Empty/Epithelial cell
3BAE2L	AGGCATTCAGAGGTTG-1_1	9-Fibroblast
3BAE2L	AGGCATTGTATTGACC-1_1	2-Epithelial cell
3BAE2L	AGGCATTGTCGACTTA-1_1	12-NK cell
3BAE2L	AGGCATTGTGTGCTTA-1_1	4-Fibroblast
3BAE2L	AGGCATTTCTTTGATC-1_1	6-Macrophage
3BAE2L	AGGCCACAGAAGCCAC-1_1	4-Fibroblast
3BAE2L	AGGCCACAGGAAAGGT-1_1	2-Epithelial cell
3BAE2L	AGGCCACAGTAACGAT-1_1	2-Epithelial cell
3BAE2L	AGGCCACAGTCAACAA-1_1	17-B cell
3BAE2L	AGGCCACCACGGCGTT-1_1	9-Fibroblast
3BAE2L	AGGCCACGTACTGCCG-1_1	3-Epithelial cell
3BAE2L	AGGCCACGTAGCTTGT-1_1	6-Macrophage
3BAE2L	AGGCCACGTGAGTTGG-1_1	5-T cell
3BAE2L	AGGCCACTCCCAAGCG-1_1	2-Epithelial cell
3BAE2L	AGGCCACTCTGAGAAA-1_1	19-Epithelial cell
3BAE2L	AGGCTGCAGATCGACG-1_1	2-Epithelial cell
3BAE2L	AGGCTGCAGCACTGGA-1_1	4-Fibroblast
3BAE2L	AGGCTGCAGGCATCAG-1_1	5-T cell
3BAE2L	AGGCTGCCAAAGGGCT-1_1	2-Epithelial cell
3BAE2L	AGGCTGCCAGCTGTCG-1_1	4-Fibroblast
3BAE2L	AGGCTGCGTAGTGCGA-1_1	14-Endothelial cell
3BAE2L	AGGCTGCGTCCAGAAG-1_1	17-B cell
3BAE2L	AGGCTGCGTGCATACT-1_1	2-Epithelial cell
3BAE2L	AGGCTGCGTGTGTTTG-1_1	5-T cell
3BAE2L	AGGCTGCGTTCGAGCC-1_1	18-T cell
3BAE2L	AGGCTGCTCCATTTAC-1_1	12-NK cell
3BAE2L	AGGCTGCTCCTATTGT-1_1	3-Epithelial cell
3BAE2L	AGGCTGCTCGTACACA-1_1	5-T cell
3BAE2L	AGGCTGCTCTTGCAAG-1_1	2-Epithelial cell
3BAE2L	AGGGAGTAGGAGTCTG-1_1	3-Epithelial cell
3BAE2L	AGGGAGTAGTTTAGGA-1_1	4-Fibroblast
3BAE2L	AGGGAGTCATCTGCGG-1_1	4-Fibroblast
3BAE2L	AGGGAGTTCGAAGGAC-1_1	4-Fibroblast
3BAE2L	AGGGCCTAGTAAGACT-1_1	2-Epithelial cell
3BAE2L	AGGGCCTAGTTGCGCC-1_1	3-Epithelial cell
3BAE2L	AGGGCCTCAATTGTGC-1_1	2-Epithelial cell
3BAE2L	AGGGCCTCACGGTGAA-1_1	4-Fibroblast
3BAE2L	AGGGCCTCATTGTACG-1_1	4-Fibroblast
3BAE2L	AGGGCCTGTATATGGA-1_1	5-T cell
3BAE2L	AGGGCCTGTATTTCTC-1_1	4-Fibroblast
3BAE2L	AGGGCCTGTCACAGTT-1_1	2-Epithelial cell
3BAE2L	AGGGCCTGTGGCAACA-1_1	3-Epithelial cell
3BAE2L	AGGGCTCAGAATCTAG-1_1	17-B cell
3BAE2L	AGGGCTCAGACTCCGC-1_1	13-Macrophage
3BAE2L	AGGGCTCAGGAGTATT-1_1	3-Epithelial cell
3BAE2L	AGGGCTCCAACAGCTT-1_1	4-Fibroblast
3BAE2L	AGGGCTCCAGCGTATT-1_1	2-Epithelial cell
3BAE2L	AGGGCTCCAGTCGTTA-1_1	3-Epithelial cell
3BAE2L	AGGGCTCGTAACTAAG-1_1	4-Fibroblast
3BAE2L	AGGGCTCGTACTCCCT-1_1	5-T cell
3BAE2L	AGGGCTCGTCGTACAT-1_1	4-Fibroblast
3BAE2L	AGGGCTCGTCTCAGGC-1_1	9-Fibroblast
3BAE2L	AGGGCTCGTTAGGAGC-1_1	4-Fibroblast
3BAE2L	AGGGCTCTCACTAGCA-1_1	15-Empty/Epithelial cell
3BAE2L	AGGGCTCTCCAAACCA-1_1	12-NK cell
3BAE2L	AGGGCTCTCTCTGCTG-1_1	6-Macrophage
3BAE2L	AGGGCTCTCTTGTTAC-1_1	4-Fibroblast
3BAE2L	AGGGTCCAGAGTTGAT-1_1	2-Epithelial cell
3BAE2L	AGGGTCCAGTCTGGTT-1_1	2-Epithelial cell
3BAE2L	AGGGTCCCACTAACGT-1_1	4-Fibroblast
3BAE2L	AGGGTCCCAGGTCTCG-1_1	6-Macrophage
3BAE2L	AGGGTCCGTCCGTACG-1_1	17-B cell
3BAE2L	AGGGTGAAGGCGACAT-1_1	14-Endothelial cell
3BAE2L	AGGGTGAAGGTCCCTG-1_1	5-T cell
3BAE2L	AGGGTGACAAGGTCAG-1_1	9-Fibroblast
3BAE2L	AGGGTGACATACCACA-1_1	5-T cell
3BAE2L	AGGGTGACATGCACTA-1_1	6-Macrophage
3BAE2L	AGGGTGATCGCAGATT-1_1	9-Fibroblast
3BAE2L	AGGGTTTCATTCTCCG-1_1	9-Fibroblast
3BAE2L	AGGGTTTGTATTGAGA-1_1	13-Macrophage
3BAE2L	AGGTAGGAGCGATGAC-1_1	19-Epithelial cell
3BAE2L	AGGTAGGAGCGCCTAC-1_1	18-T cell
3BAE2L	AGGTAGGAGTACGAGC-1_1	6-Macrophage
3BAE2L	AGGTAGGGTCAATCTG-1_1	3-Epithelial cell
3BAE2L	AGGTAGGGTTCCCACT-1_1	2-Epithelial cell
3BAE2L	AGGTAGGTCAGCATTG-1_1	2-Epithelial cell
3BAE2L	AGGTAGGTCATTCGTT-1_1	4-Fibroblast
3BAE2L	AGGTAGGTCATTTCGT-1_1	21-T cell
3BAE2L	AGGTAGGTCTAGTACG-1_1	4-Fibroblast
3BAE2L	AGGTCATAGTATGAGT-1_1	3-Epithelial cell
3BAE2L	AGGTCATCAGCTACCG-1_1	5-T cell
3BAE2L	AGGTCATCAGGTGTTT-1_1	15-Empty/Epithelial cell
3BAE2L	AGGTCATCAGTCGCAC-1_1	3-Epithelial cell
3BAE2L	AGGTCATCATACCAGT-1_1	15-Empty/Epithelial cell
3BAE2L	AGGTCATTCATTGAGC-1_1	3-Epithelial cell
3BAE2L	AGGTCTAAGAAACACT-1_1	4-Fibroblast
3BAE2L	AGGTCTAAGCATCAGG-1_1	5-T cell
3BAE2L	AGGTCTAAGTCCTGTA-1_1	2-Epithelial cell
3BAE2L	AGGTCTACAAAGACGC-1_1	5-T cell
3BAE2L	AGGTCTAGTTGCCAAT-1_1	9-Fibroblast
3BAE2L	AGGTCTATCTACACTT-1_1	2-Epithelial cell
3BAE2L	AGGTCTATCTTCGCTG-1_1	2-Epithelial cell
3BAE2L	AGGTGTTAGCTGGCTC-1_1	2-Epithelial cell
3BAE2L	AGGTGTTAGGGCGAAG-1_1	2-Epithelial cell
3BAE2L	AGGTGTTCAGGCCCTA-1_1	21-T cell
3BAE2L	AGGTGTTCATACAGCT-1_1	15-Empty/Epithelial cell
3BAE2L	AGGTGTTGTAACTTCG-1_1	3-Epithelial cell
3BAE2L	AGGTGTTGTACAGTTC-1_1	6-Macrophage
3BAE2L	AGGTGTTGTATTCTCT-1_1	6-Macrophage
3BAE2L	AGGTGTTTCCGCTTAC-1_1	3-Epithelial cell
3BAE2L	AGGTGTTTCGCGTCGA-1_1	2-Epithelial cell
3BAE2L	AGGTGTTTCTATGTGG-1_1	9-Fibroblast
3BAE2L	AGGTTACAGAGTAACT-1_1	3-Epithelial cell
3BAE2L	AGGTTACAGTTGCCCG-1_1	2-Epithelial cell
3BAE2L	AGGTTACCACCAGTAT-1_1	2-Epithelial cell
3BAE2L	AGGTTACCATACAGGG-1_1	2-Epithelial cell
3BAE2L	AGGTTACGTAGCACAG-1_1	2-Epithelial cell
3BAE2L	AGGTTACGTGTAGTGG-1_1	15-Empty/Epithelial cell
3BAE2L	AGGTTACTCCCATTCG-1_1	12-NK cell
3BAE2L	AGGTTACTCCCGAACG-1_1	9-Fibroblast
3BAE2L	AGGTTGTAGATACAGT-1_1	4-Fibroblast
3BAE2L	AGGTTGTCAAAGGATT-1_1	2-Epithelial cell
3BAE2L	AGGTTGTCAAATTAGG-1_1	2-Epithelial cell
3BAE2L	AGGTTGTCACTGTGAT-1_1	15-Empty/Epithelial cell
3BAE2L	AGGTTGTCAGCCATTA-1_1	3-Epithelial cell
3BAE2L	AGGTTGTCAGCCTATA-1_1	2-Epithelial cell
3BAE2L	AGGTTGTGTCATACCA-1_1	2-Epithelial cell
3BAE2L	AGTAACCAGATGACAT-1_1	15-Empty/Epithelial cell
3BAE2L	AGTAACCAGCATGGGT-1_1	3-Epithelial cell
3BAE2L	AGTAACCAGGTTGAGC-1_1	4-Fibroblast
3BAE2L	AGTAACCAGTATGCAA-1_1	3-Epithelial cell
3BAE2L	AGTAACCCACAGAAGC-1_1	2-Epithelial cell
3BAE2L	AGTAACCCACAGTCAT-1_1	5-T cell
3BAE2L	AGTAACCCATCGCTGG-1_1	3-Epithelial cell
3BAE2L	AGTAACCGTGGATTTC-1_1	2-Epithelial cell
3BAE2L	AGTACCAAGGTCTACT-1_1	2-Epithelial cell
3BAE2L	AGTACCACATTGAAAG-1_1	12-NK cell
3BAE2L	AGTACCATCCGATAAC-1_1	3-Epithelial cell
3BAE2L	AGTACCATCGCTGATA-1_1	9-Fibroblast
3BAE2L	AGTACCATCTGCTTAT-1_1	6-Macrophage
3BAE2L	AGTACTGAGATGCAGC-1_1	6-Macrophage
3BAE2L	AGTACTGAGGCTCACC-1_1	9-Fibroblast
3BAE2L	AGTACTGCACAAGCCC-1_1	4-Fibroblast
3BAE2L	AGTACTGCACAGTCAT-1_1	12-NK cell
3BAE2L	AGTACTGGTTTAGACC-1_1	6-Macrophage
3BAE2L	AGTACTGTCTCTCTTC-1_1	4-Fibroblast
3BAE2L	AGTACTGTCTTAGCTT-1_1	15-Empty/Epithelial cell
3BAE2L	AGTAGCTAGCTAAGTA-1_1	12-NK cell
3BAE2L	AGTAGCTCACATTGTG-1_1	4-Fibroblast
3BAE2L	AGTAGCTCACCGGTCA-1_1	9-Fibroblast
3BAE2L	AGTAGCTCACTTTATC-1_1	3-Epithelial cell
3BAE2L	AGTAGCTCATCCGAGC-1_1	3-Epithelial cell
3BAE2L	AGTAGCTGTCAACACT-1_1	4-Fibroblast
3BAE2L	AGTAGCTGTCCACAGC-1_1	5-T cell
3BAE2L	AGTAGTCAGAATCTAG-1_1	2-Epithelial cell
3BAE2L	AGTAGTCAGCTAATGA-1_1	4-Fibroblast
3BAE2L	AGTAGTCAGGAGCTGT-1_1	3-Epithelial cell
3BAE2L	AGTAGTCCAAGCCTGC-1_1	6-Macrophage
3BAE2L	AGTAGTCCATGGCCCA-1_1	3-Epithelial cell
3BAE2L	AGTAGTCCATGTGACT-1_1	9-Fibroblast
3BAE2L	AGTAGTCGTCGTATTG-1_1	2-Epithelial cell
3BAE2L	AGTAGTCTCAGACTGT-1_1	15-Empty/Epithelial cell
3BAE2L	AGTAGTCTCGAACGCC-1_1	3-Epithelial cell
3BAE2L	AGTCAACAGTGCAGCA-1_1	3-Epithelial cell
3BAE2L	AGTCAACCAAACCACT-1_1	5-T cell
3BAE2L	AGTCAACCAACGCATT-1_1	2-Epithelial cell
3BAE2L	AGTCAACCACGCAAAG-1_1	3-Epithelial cell
3BAE2L	AGTCAACCAGTCAACT-1_1	4-Fibroblast
3BAE2L	AGTCAACGTGTTCAGT-1_1	2-Epithelial cell
3BAE2L	AGTCACACAATTCTTC-1_1	3-Epithelial cell
3BAE2L	AGTCACACACCTATCC-1_1	4-Fibroblast
3BAE2L	AGTCACACACTGTGAT-1_1	17-B cell
3BAE2L	AGTCACAGTACTAACC-1_1	6-Macrophage
3BAE2L	AGTCACAGTGCTAGCC-1_1	3-Epithelial cell
3BAE2L	AGTCACATCCATCAGA-1_1	2-Epithelial cell
3BAE2L	AGTCACATCTTTGCAT-1_1	3-Epithelial cell
3BAE2L	AGTCATGAGCGTGTTT-1_1	3-Epithelial cell
3BAE2L	AGTCATGAGCTAATGA-1_1	6-Macrophage
3BAE2L	AGTCATGAGTCCTGTA-1_1	2-Epithelial cell
3BAE2L	AGTCATGAGTGTACAA-1_1	4-Fibroblast
3BAE2L	AGTCATGTCCTGTAAG-1_1	3-Epithelial cell
3BAE2L	AGTCTCCAGGGTACGT-1_1	2-Epithelial cell
3BAE2L	AGTCTCCAGTAAGGGA-1_1	9-Fibroblast
3BAE2L	AGTCTCCCATACATCG-1_1	6-Macrophage
3BAE2L	AGTCTCCTCAAGTGGG-1_1	5-T cell
3BAE2L	AGTCTCCTCTCCGCAT-1_1	9-Fibroblast
3BAE2L	AGTCTCCTCTGATTCT-1_1	5-T cell
3BAE2L	AGTGACTAGCAGTAAT-1_1	5-T cell
3BAE2L	AGTGACTAGTCGAAAT-1_1	2-Epithelial cell
3BAE2L	AGTGACTCACTTCATT-1_1	6-Macrophage
3BAE2L	AGTGACTCATACATCG-1_1	4-Fibroblast
3BAE2L	AGTGACTGTAATTGGA-1_1	2-Epithelial cell
3BAE2L	AGTGACTTCTGGCCTT-1_1	3-Epithelial cell
3BAE2L	AGTGATCAGCCACAAG-1_1	2-Epithelial cell
3BAE2L	AGTGATCCACGTCATA-1_1	6-Macrophage
3BAE2L	AGTGATCCAGAGTGTG-1_1	6-Macrophage
3BAE2L	AGTGATCCAGATACTC-1_1	2-Epithelial cell
3BAE2L	AGTGATCCAGCCTTCT-1_1	9-Fibroblast
3BAE2L	AGTGATCCAGTCGGAA-1_1	9-Fibroblast
3BAE2L	AGTGATCCATCGGCCA-1_1	12-NK cell
3BAE2L	AGTGATCTCGTGTGGC-1_1	3-Epithelial cell
3BAE2L	AGTGATCTCTGTACAG-1_1	18-T cell
3BAE2L	AGTGCCGAGCCGAACA-1_1	6-Macrophage
3BAE2L	AGTGCCGAGTTGCGAG-1_1	2-Epithelial cell
3BAE2L	AGTGCCGCAATGTCTG-1_1	2-Epithelial cell
3BAE2L	AGTGCCGCAGGTAGTG-1_1	2-Epithelial cell
3BAE2L	AGTGCCGCAGTCGAGA-1_1	6-Macrophage
3BAE2L	AGTGCCGGTGAGCCAA-1_1	9-Fibroblast
3BAE2L	AGTGCCGTCACTGCTC-1_1	17-B cell
3BAE2L	AGTGCCGTCAGGACAG-1_1	12-NK cell
3BAE2L	AGTGCCGTCGACACCG-1_1	2-Epithelial cell
3BAE2L	AGTGCCGTCGCCATAA-1_1	4-Fibroblast
3BAE2L	AGTGTTGAGAGGATCC-1_1	9-Fibroblast
3BAE2L	AGTGTTGAGGTCACAG-1_1	6-Macrophage
3BAE2L	AGTGTTGAGTAGGGTC-1_1	2-Epithelial cell
3BAE2L	AGTGTTGAGTATAGAC-1_1	2-Epithelial cell
3BAE2L	AGTGTTGAGTTTGTCG-1_1	2-Epithelial cell
3BAE2L	AGTGTTGCAAATTGGA-1_1	6-Macrophage
3BAE2L	AGTGTTGCACTAAACC-1_1	2-Epithelial cell
3BAE2L	AGTGTTGCATTGGGAG-1_1	2-Epithelial cell
3BAE2L	AGTGTTGGTACCTAGT-1_1	4-Fibroblast
3BAE2L	AGTGTTGGTCTGTAAC-1_1	6-Macrophage
3BAE2L	AGTGTTGGTTTGACAC-1_1	3-Epithelial cell
3BAE2L	AGTGTTGTCCGAGGCT-1_1	2-Epithelial cell
3BAE2L	AGTTAGCAGCGTCGAA-1_1	6-Macrophage
3BAE2L	AGTTAGCCATGACAAA-1_1	21-T cell
3BAE2L	AGTTAGCCATGCCGGT-1_1	3-Epithelial cell
3BAE2L	AGTTAGCGTGCGGCTT-1_1	5-T cell
3BAE2L	AGTTAGCTCCCAGGCA-1_1	5-T cell
3BAE2L	AGTTAGCTCGATTGGT-1_1	5-T cell
3BAE2L	AGTTAGCTCGCGTCGA-1_1	9-Fibroblast
3BAE2L	AGTTCCCAGGGCAGAG-1_1	3-Epithelial cell
3BAE2L	AGTTCCCGTACTCCCT-1_1	2-Epithelial cell
3BAE2L	AGTTCCCGTCACCACG-1_1	2-Epithelial cell
3BAE2L	AGTTCCCGTGACACAG-1_1	3-Epithelial cell
3BAE2L	AGTTCCCTCATCGCAA-1_1	21-T cell
3BAE2L	AGTTCCCTCCCGTTCA-1_1	15-Empty/Epithelial cell
3BAE2L	AGTTCCCTCGCTTACC-1_1	6-Macrophage
3BAE2L	AGTTCGAAGAAACACT-1_1	9-Fibroblast
3BAE2L	AGTTCGAAGCTGTACT-1_1	12-NK cell
3BAE2L	AGTTCGAAGGCGCTTC-1_1	18-T cell
3BAE2L	AGTTCGACAATCAGCT-1_1	13-Macrophage
3BAE2L	AGTTCGACACACGGAA-1_1	6-Macrophage
3BAE2L	AGTTCGACAGTGTGGA-1_1	2-Epithelial cell
3BAE2L	AGTTCGAGTTTACGTG-1_1	3-Epithelial cell
3BAE2L	AGTTCGATCACTGCTC-1_1	6-Macrophage
3BAE2L	AGTTCGATCGTAACTG-1_1	2-Epithelial cell
3BAE2L	AGTTCGATCGTCGGGT-1_1	2-Epithelial cell
3BAE2L	ATACCGAAGAGCAGAA-1_1	5-T cell
3BAE2L	ATACCGACAGAGTTCT-1_1	13-Macrophage
3BAE2L	ATACCGAGTGACAACG-1_1	2-Epithelial cell
3BAE2L	ATACCGAGTGGTGATG-1_1	2-Epithelial cell
3BAE2L	ATACCGATCAAGCCGC-1_1	3-Epithelial cell
3BAE2L	ATACCGATCCGAGAAG-1_1	12-NK cell
3BAE2L	ATACCGATCGAGCCTG-1_1	4-Fibroblast
3BAE2L	ATACCGATCTTGCGCT-1_1	5-T cell
3BAE2L	ATACCTTAGCTTCATG-1_1	9-Fibroblast
3BAE2L	ATACCTTAGGTGATCG-1_1	2-Epithelial cell
3BAE2L	ATACCTTCACTGGCCA-1_1	12-NK cell
3BAE2L	ATACCTTCAGCGGTCT-1_1	13-Macrophage
3BAE2L	ATACCTTGTACGGGAT-1_1	4-Fibroblast
3BAE2L	ATACCTTTCAGCCTTC-1_1	12-NK cell
3BAE2L	ATACCTTTCGTACACA-1_1	2-Epithelial cell
3BAE2L	ATACTTCAGTAATCCC-1_1	4-Fibroblast
3BAE2L	ATACTTCAGTCATCCA-1_1	2-Epithelial cell
3BAE2L	ATACTTCCAGCGAACA-1_1	6-Macrophage
3BAE2L	ATACTTCCATCGGAAG-1_1	6-Macrophage
3BAE2L	ATACTTCGTCAACCTA-1_1	3-Epithelial cell
3BAE2L	ATACTTCTCACTTCTA-1_1	4-Fibroblast
3BAE2L	ATACTTCTCAGACATC-1_1	14-Endothelial cell
3BAE2L	ATACTTCTCCGTGTAA-1_1	4-Fibroblast
3BAE2L	ATAGACCAGATGACAT-1_1	4-Fibroblast
3BAE2L	ATAGACCAGGACACTG-1_1	2-Epithelial cell
3BAE2L	ATAGACCCACGACCTG-1_1	2-Epithelial cell
3BAE2L	ATAGACCCATAGGTAA-1_1	9-Fibroblast
3BAE2L	ATAGACCCATATCTCT-1_1	14-Endothelial cell
3BAE2L	ATAGAGAAGCCTAACT-1_1	4-Fibroblast
3BAE2L	ATAGAGAAGCGTGCTC-1_1	15-Empty/Epithelial cell
3BAE2L	ATAGAGACAAAGGAGA-1_1	6-Macrophage
3BAE2L	ATAGAGACACGCGGTT-1_1	3-Epithelial cell
3BAE2L	ATAGAGACACTACAGT-1_1	2-Epithelial cell
3BAE2L	ATAGAGACATGACTCA-1_1	15-Empty/Epithelial cell
3BAE2L	ATAGAGATCATTACTC-1_1	2-Epithelial cell
3BAE2L	ATAGAGATCTACTTCA-1_1	3-Epithelial cell
3BAE2L	ATAGGCTAGCCTAACT-1_1	2-Epithelial cell
3BAE2L	ATAGGCTAGGGAGGAC-1_1	12-NK cell
3BAE2L	ATAGGCTAGTACAGAT-1_1	2-Epithelial cell
3BAE2L	ATAGGCTCAATGTCTG-1_1	6-Macrophage
3BAE2L	ATAGGCTCACTGGCCA-1_1	20-Macrophage
3BAE2L	ATATCCTAGCATGCGA-1_1	14-Endothelial cell
3BAE2L	ATATCCTAGTCACTGT-1_1	4-Fibroblast
3BAE2L	ATATCCTGTAGCGTAG-1_1	6-Macrophage
3BAE2L	ATATCCTGTCAAGCGA-1_1	6-Macrophage
3BAE2L	ATATCCTGTGCCTACG-1_1	4-Fibroblast
3BAE2L	ATATCCTGTTCTCAGA-1_1	5-T cell
3BAE2L	ATATCCTGTTTGAAAG-1_1	14-Endothelial cell
3BAE2L	ATATCCTTCACCGGTG-1_1	4-Fibroblast
3BAE2L	ATATCCTTCTATCGGA-1_1	15-Empty/Epithelial cell
3BAE2L	ATATCCTTCTTAAGGC-1_1	5-T cell
3BAE2L	ATCACAGAGCCTCAGC-1_1	5-T cell
3BAE2L	ATCACAGAGGTTACAA-1_1	9-Fibroblast
3BAE2L	ATCACAGCAATTTCCT-1_1	5-T cell
3BAE2L	ATCACAGCACAGCTTA-1_1	6-Macrophage
3BAE2L	ATCACAGGTATATGGA-1_1	3-Epithelial cell
3BAE2L	ATCACAGTCGTCAACA-1_1	12-NK cell
3BAE2L	ATCACGAAGGTAAGGA-1_1	12-NK cell
3BAE2L	ATCACGACAAAGAGTT-1_1	15-Empty/Epithelial cell
3BAE2L	ATCACGACACTGTGTA-1_1	14-Endothelial cell
3BAE2L	ATCACGACAGTCCCGA-1_1	9-Fibroblast
3BAE2L	ATCACGACATCCTTCG-1_1	9-Fibroblast
3BAE2L	ATCACGAGTAGACTGG-1_1	3-Epithelial cell
3BAE2L	ATCACGAGTGAGTTTC-1_1	5-T cell
3BAE2L	ATCACGAGTGGCTTGC-1_1	6-Macrophage
3BAE2L	ATCACGATCCATTCGC-1_1	6-Macrophage
3BAE2L	ATCACTTAGATTGGGC-1_1	4-Fibroblast
3BAE2L	ATCACTTAGGTATCTC-1_1	4-Fibroblast
3BAE2L	ATCACTTCACAGTCAT-1_1	12-NK cell
3BAE2L	ATCACTTGTTTGCCGG-1_1	4-Fibroblast
3BAE2L	ATCACTTTCAAGTCTG-1_1	2-Epithelial cell
3BAE2L	ATCACTTTCTACTGCC-1_1	6-Macrophage
3BAE2L	ATCAGGTAGACCAGCA-1_1	23-Macrophage
3BAE2L	ATCAGGTAGCAACTTC-1_1	4-Fibroblast
3BAE2L	ATCAGGTAGTCATAGA-1_1	4-Fibroblast
3BAE2L	ATCAGGTCACCGTACG-1_1	15-Empty/Epithelial cell
3BAE2L	ATCAGGTTCCGGACTG-1_1	14-Endothelial cell
3BAE2L	ATCAGGTTCGAGTACT-1_1	2-Epithelial cell
3BAE2L	ATCAGGTTCGATTGAC-1_1	9-Fibroblast
3BAE2L	ATCAGGTTCGCCTAGG-1_1	3-Epithelial cell
3BAE2L	ATCAGGTTCGTGGGAA-1_1	4-Fibroblast
3BAE2L	ATCATTCAGTAACGAT-1_1	5-T cell
3BAE2L	ATCATTCAGTCACAGG-1_1	2-Epithelial cell
3BAE2L	ATCATTCCAGAACATA-1_1	19-Epithelial cell
3BAE2L	ATCATTCGTCAAAGCG-1_1	2-Epithelial cell
3BAE2L	ATCATTCTCAAGCGTT-1_1	2-Epithelial cell
3BAE2L	ATCATTCTCCACGTGG-1_1	2-Epithelial cell
3BAE2L	ATCCACCAGCAAATGT-1_1	15-Empty/Epithelial cell
3BAE2L	ATCCACCAGCGATGAC-1_1	14-Endothelial cell
3BAE2L	ATCCACCAGGGCCAAT-1_1	15-Empty/Epithelial cell
3BAE2L	ATCCACCCAGACCATT-1_1	3-Epithelial cell
3BAE2L	ATCCACCCATCACGGC-1_1	15-Empty/Epithelial cell
3BAE2L	ATCCACCGTCCGGACT-1_1	3-Epithelial cell
3BAE2L	ATCCACCGTCGGTACC-1_1	2-Epithelial cell
3BAE2L	ATCCACCGTCTAGTGT-1_1	6-Macrophage
3BAE2L	ATCCACCTCGTTCTGC-1_1	6-Macrophage
3BAE2L	ATCCACCTCTACCTTA-1_1	2-Epithelial cell
3BAE2L	ATCCATTAGACAGCTG-1_1	4-Fibroblast
3BAE2L	ATCCATTAGATTAGAC-1_1	3-Epithelial cell
3BAE2L	ATCCATTCAGAGATTA-1_1	2-Epithelial cell
3BAE2L	ATCCATTGTTTCGTGA-1_1	4-Fibroblast
3BAE2L	ATCCATTTCATGGGAG-1_1	3-Epithelial cell
3BAE2L	ATCCATTTCCGATCGG-1_1	9-Fibroblast
3BAE2L	ATCCATTTCGGCGATC-1_1	13-Macrophage
3BAE2L	ATCCCTGAGCTGGCCT-1_1	9-Fibroblast
3BAE2L	ATCCCTGCAATGAAAC-1_1	3-Epithelial cell
3BAE2L	ATCCCTGCAGAGGGTT-1_1	20-Macrophage
3BAE2L	ATCCCTGGTAGCACGA-1_1	14-Endothelial cell
3BAE2L	ATCCCTGGTTGTCAGT-1_1	4-Fibroblast
3BAE2L	ATCCCTGTCAAGGCTT-1_1	4-Fibroblast
3BAE2L	ATCCGTCCACCTGATA-1_1	9-Fibroblast
3BAE2L	ATCCGTCCAGCCGTTG-1_1	3-Epithelial cell
3BAE2L	ATCCGTCGTGAGATCG-1_1	6-Macrophage
3BAE2L	ATCCGTCTCTCAAAGC-1_1	6-Macrophage
3BAE2L	ATCCTATCAGGTGAGT-1_1	2-Epithelial cell
3BAE2L	ATCCTATGTGTGTTTG-1_1	2-Epithelial cell
3BAE2L	ATCCTATTCCACTTCG-1_1	9-Fibroblast
3BAE2L	ATCGATGAGTCCGCCA-1_1	6-Macrophage
3BAE2L	ATCGATGAGTTGCTGT-1_1	2-Epithelial cell
3BAE2L	ATCGATGCACCGTGCA-1_1	3-Epithelial cell
3BAE2L	ATCGATGGTCCAATCA-1_1	2-Epithelial cell
3BAE2L	ATCGATGGTCTGTCAA-1_1	14-Endothelial cell
3BAE2L	ATCGATGGTTAGCGGA-1_1	2-Epithelial cell
3BAE2L	ATCGATGTCATCGGGC-1_1	5-T cell
3BAE2L	ATCGATGTCGCTGTCT-1_1	5-T cell
3BAE2L	ATCGCCTAGAAGAACG-1_1	19-Epithelial cell
3BAE2L	ATCGCCTAGAAGCTCG-1_1	3-Epithelial cell
3BAE2L	ATCGCCTAGGGTATAT-1_1	4-Fibroblast
3BAE2L	ATCGCCTGTCAGCGTC-1_1	4-Fibroblast
3BAE2L	ATCGCCTTCTTGGAAC-1_1	17-B cell
3BAE2L	ATCGGATAGATGTTGA-1_1	12-NK cell
3BAE2L	ATCGGATCACCACTGG-1_1	9-Fibroblast
3BAE2L	ATCGGATCACTGTCGG-1_1	2-Epithelial cell
3BAE2L	ATCGGATGTACAAGTA-1_1	6-Macrophage
3BAE2L	ATCGGATGTCACTCTC-1_1	6-Macrophage
3BAE2L	ATCGGATGTTGCCGAC-1_1	18-T cell
3BAE2L	ATCGGATTCTAATTCC-1_1	9-Fibroblast
3BAE2L	ATCGGATTCTATCGTT-1_1	4-Fibroblast
3BAE2L	ATCGGCGAGACTTCAC-1_1	12-NK cell
3BAE2L	ATCGGCGAGCGCCTCA-1_1	2-Epithelial cell
3BAE2L	ATCGGCGAGGAACTCG-1_1	2-Epithelial cell
3BAE2L	ATCGGCGAGGGACACT-1_1	2-Epithelial cell
3BAE2L	ATCGGCGAGGGCGAAG-1_1	3-Epithelial cell
3BAE2L	ATCGGCGCATGTCAGT-1_1	1-Fibroblast
3BAE2L	ATCGGCGGTCCTACGG-1_1	6-Macrophage
3BAE2L	ATCGGCGGTGCCGTTG-1_1	12-NK cell
3BAE2L	ATCGGCGGTGTGACCC-1_1	21-T cell
3BAE2L	ATCGGCGTCGGAAACG-1_1	13-Macrophage
3BAE2L	ATCGGCGTCTTGGTCC-1_1	15-Empty/Epithelial cell
3BAE2L	ATCGTAGAGGCGATAC-1_1	2-Epithelial cell
3BAE2L	ATCGTAGCAATGTTGC-1_1	12-NK cell
3BAE2L	ATCGTAGCACTGAGGA-1_1	9-Fibroblast
3BAE2L	ATCGTAGTCCCTAGGG-1_1	14-Endothelial cell
3BAE2L	ATCGTCCAGCCTGGAA-1_1	4-Fibroblast
3BAE2L	ATCGTCCCACTCGATA-1_1	6-Macrophage
3BAE2L	ATCGTCCCAGGAATAT-1_1	14-Endothelial cell
3BAE2L	ATCGTCCCAGTGGGTA-1_1	4-Fibroblast
3BAE2L	ATCGTCCGTATTCTCT-1_1	6-Macrophage
3BAE2L	ATCGTCCGTCATTCCC-1_1	12-NK cell
3BAE2L	ATCGTCCGTCGAACAG-1_1	12-NK cell
3BAE2L	ATCGTCCGTCTCACAA-1_1	3-Epithelial cell
3BAE2L	ATCGTCCGTCTGCATA-1_1	6-Macrophage
3BAE2L	ATCGTCCTCTATCACT-1_1	5-T cell
3BAE2L	ATCGTGACAAAGCTAA-1_1	2-Epithelial cell
3BAE2L	ATCGTGACAAATCGGG-1_1	9-Fibroblast
3BAE2L	ATCGTGATCGCCATAA-1_1	12-NK cell
3BAE2L	ATCGTGATCTGTCGTC-1_1	19-Epithelial cell
3BAE2L	ATCTCTAAGAGGATCC-1_1	3-Epithelial cell
3BAE2L	ATCTCTAAGGAAAGAC-1_1	12-NK cell
3BAE2L	ATCTCTAGTATGAAAC-1_1	9-Fibroblast
3BAE2L	ATCTCTATCGTGGCGT-1_1	4-Fibroblast
3BAE2L	ATCTTCAAGACCTCAT-1_1	6-Macrophage
3BAE2L	ATCTTCAAGTACAGCG-1_1	3-Epithelial cell
3BAE2L	ATCTTCACAACCAGAG-1_1	3-Epithelial cell
3BAE2L	ATCTTCACATTACTCT-1_1	2-Epithelial cell
3BAE2L	ATCTTCATCATCCTGC-1_1	15-Empty/Epithelial cell
3BAE2L	ATCTTCATCTGGGCAC-1_1	4-Fibroblast
3BAE2L	ATGAAAGAGAGGACTC-1_1	14-Endothelial cell
3BAE2L	ATGAAAGAGATCGCTT-1_1	6-Macrophage
3BAE2L	ATGAAAGAGATGCTGG-1_1	5-T cell
3BAE2L	ATGAAAGAGATGTTAG-1_1	2-Epithelial cell
3BAE2L	ATGAAAGAGCGGTAGT-1_1	9-Fibroblast
3BAE2L	ATGAAAGAGGCTCACC-1_1	6-Macrophage
3BAE2L	ATGAAAGAGTTGTCAC-1_1	4-Fibroblast
3BAE2L	ATGAAAGAGTTTGGCT-1_1	6-Macrophage
3BAE2L	ATGAAAGCAGTTTGGT-1_1	4-Fibroblast
3BAE2L	ATGAAAGGTAGGCAGT-1_1	9-Fibroblast
3BAE2L	ATGAAAGGTGAGACCA-1_1	2-Epithelial cell
3BAE2L	ATGAAAGGTGCCTGCA-1_1	14-Endothelial cell
3BAE2L	ATGAAAGGTGGTGATG-1_1	9-Fibroblast
3BAE2L	ATGAAAGTCACGAGGA-1_1	3-Epithelial cell
3BAE2L	ATGACCAAGGACCCAA-1_1	4-Fibroblast
3BAE2L	ATGACCAAGGTCGCCT-1_1	9-Fibroblast
3BAE2L	ATGACCAAGTAGAATC-1_1	5-T cell
3BAE2L	ATGACCACAAGAGAGA-1_1	4-Fibroblast
3BAE2L	ATGACCACACTGGATT-1_1	2-Epithelial cell
3BAE2L	ATGACCACACTTCATT-1_1	5-T cell
3BAE2L	ATGACCAGTTAGGGTG-1_1	3-Epithelial cell
3BAE2L	ATGACCATCAAGATAG-1_1	5-T cell
3BAE2L	ATGACCATCAGGACAG-1_1	2-Epithelial cell
3BAE2L	ATGAGGGAGCGCCTTG-1_1	6-Macrophage
3BAE2L	ATGAGGGAGCGCGTTC-1_1	2-Epithelial cell
3BAE2L	ATGAGGGCAATTGCAC-1_1	9-Fibroblast
3BAE2L	ATGAGGGCAGCGTATT-1_1	17-B cell
3BAE2L	ATGAGGGCATGTACGT-1_1	20-Macrophage
3BAE2L	ATGAGGGTCTACAGGT-1_1	12-NK cell
3BAE2L	ATGAGTCAGGATCATA-1_1	2-Epithelial cell
3BAE2L	ATGAGTCAGTTCATGC-1_1	9-Fibroblast
3BAE2L	ATGAGTCCAAAGGAGA-1_1	13-Macrophage
3BAE2L	ATGAGTCGTAACATCC-1_1	5-T cell
3BAE2L	ATGAGTCGTAGCACGA-1_1	3-Epithelial cell
3BAE2L	ATGAGTCGTCATAGTC-1_1	5-T cell
3BAE2L	ATGAGTCTCAAGAGGC-1_1	3-Epithelial cell
3BAE2L	ATGAGTCTCAGCCTCT-1_1	19-Epithelial cell
3BAE2L	ATGAGTCTCCACAAGT-1_1	3-Epithelial cell
3BAE2L	ATGAGTCTCGCCGTGA-1_1	6-Macrophage
3BAE2L	ATGAGTCTCTGTTGGA-1_1	5-T cell
3BAE2L	ATGAGTCTCTTACCGC-1_1	2-Epithelial cell
3BAE2L	ATGATCGAGACTTCCA-1_1	3-Epithelial cell
3BAE2L	ATGATCGAGAGTTGAT-1_1	17-B cell
3BAE2L	ATGATCGAGGTAGCAC-1_1	3-Epithelial cell
3BAE2L	ATGATCGAGGTGGGTT-1_1	14-Endothelial cell
3BAE2L	ATGATCGCAACCTATG-1_1	9-Fibroblast
3BAE2L	ATGATCGCACGGCGTT-1_1	9-Fibroblast
3BAE2L	ATGATCGCAGGACTTT-1_1	15-Empty/Epithelial cell
3BAE2L	ATGATCGCATGTGGCC-1_1	5-T cell
3BAE2L	ATGATCGCATTCAGGT-1_1	2-Epithelial cell
3BAE2L	ATGATCGGTAGTCCTA-1_1	14-Endothelial cell
3BAE2L	ATGATCGGTTCGAAGG-1_1	5-T cell
3BAE2L	ATGATCGTCATCTCTA-1_1	2-Epithelial cell
3BAE2L	ATGCATGAGATAGGGA-1_1	4-Fibroblast
3BAE2L	ATGCATGAGCCACCGT-1_1	9-Fibroblast
3BAE2L	ATGCATGAGGCCCGTT-1_1	19-Epithelial cell
3BAE2L	ATGCATGAGTCTAGAA-1_1	9-Fibroblast
3BAE2L	ATGCATGAGTCTCTGA-1_1	5-T cell
3BAE2L	ATGCATGAGTGAGCCA-1_1	5-T cell
3BAE2L	ATGCATGCAACTTGGT-1_1	14-Endothelial cell
3BAE2L	ATGCATGCACTCCTGT-1_1	14-Endothelial cell
3BAE2L	ATGCATGCACTGGATT-1_1	2-Epithelial cell
3BAE2L	ATGCATGGTTCTTCAT-1_1	2-Epithelial cell
3BAE2L	ATGCATGGTTTGCCGG-1_1	4-Fibroblast
3BAE2L	ATGCATGTCTACCACC-1_1	3-Epithelial cell
3BAE2L	ATGCATGTCTGCGAGC-1_1	6-Macrophage
3BAE2L	ATGCCTCAGGCAGGGA-1_1	2-Epithelial cell
3BAE2L	ATGCCTCCATGACACT-1_1	4-Fibroblast
3BAE2L	ATGCCTCCATGGAAGC-1_1	5-T cell
3BAE2L	ATGCCTCGTCTCAAGT-1_1	14-Endothelial cell
3BAE2L	ATGCCTCGTTCGGTCG-1_1	2-Epithelial cell
3BAE2L	ATGCCTCTCATCGGGC-1_1	17-B cell
3BAE2L	ATGCCTCTCTCTTGCG-1_1	14-Endothelial cell
3BAE2L	ATGCGATAGTATAGAC-1_1	2-Epithelial cell
3BAE2L	ATGCGATCAATTCTCT-1_1	3-Epithelial cell
3BAE2L	ATGCGATCATATCGGT-1_1	6-Macrophage
3BAE2L	ATGCGATGTGGATCAG-1_1	3-Epithelial cell
3BAE2L	ATGCGATTCAATGCAC-1_1	9-Fibroblast
3BAE2L	ATGCGATTCACATTGG-1_1	2-Epithelial cell
3BAE2L	ATGCGATTCCATGCAA-1_1	6-Macrophage
3BAE2L	ATGGAGGAGTAGTCTC-1_1	2-Epithelial cell
3BAE2L	ATGGAGGTCCATGAGT-1_1	2-Epithelial cell
3BAE2L	ATGGAGGTCGAATGCT-1_1	4-Fibroblast
3BAE2L	ATGGAGGTCTGAATGC-1_1	19-Epithelial cell
3BAE2L	ATGGATCAGAAGGGAT-1_1	5-T cell
3BAE2L	ATGGATCGTCGGTAAG-1_1	4-Fibroblast
3BAE2L	ATGGATCGTCGTGTTA-1_1	9-Fibroblast
3BAE2L	ATGGATCGTCTGCCTT-1_1	13-Macrophage
3BAE2L	ATGGATCGTGTCCAAT-1_1	6-Macrophage
3BAE2L	ATGGATCGTTGCGAAG-1_1	4-Fibroblast
3BAE2L	ATGGATCGTTTGACAC-1_1	9-Fibroblast
3BAE2L	ATGGATCTCAGGACAG-1_1	14-Endothelial cell
3BAE2L	ATGGATCTCCCGTGTT-1_1	5-T cell
3BAE2L	ATGGATCTCGCTAGCG-1_1	12-NK cell
3BAE2L	ATGGGAGAGACGCCAA-1_1	6-Macrophage
3BAE2L	ATGGGAGAGCACCTGC-1_1	3-Epithelial cell
3BAE2L	ATGGGAGAGTCTAGAA-1_1	6-Macrophage
3BAE2L	ATGGGAGAGTTCGCAT-1_1	3-Epithelial cell
3BAE2L	ATGGGAGAGTTTCGAC-1_1	6-Macrophage
3BAE2L	ATGGGAGCAACGGCTC-1_1	2-Epithelial cell
3BAE2L	ATGGGAGCACTTCAGA-1_1	3-Epithelial cell
3BAE2L	ATGGGAGCAGCTTTGA-1_1	20-Macrophage
3BAE2L	ATGGGAGGTCCCGCAA-1_1	3-Epithelial cell
3BAE2L	ATGGGAGGTCCTGGTG-1_1	9-Fibroblast
3BAE2L	ATGGGAGGTGAGATAT-1_1	15-Empty/Epithelial cell
3BAE2L	ATGGGAGGTTCTGAGT-1_1	23-Macrophage
3BAE2L	ATGGGAGTCCTACACC-1_1	13-Macrophage
3BAE2L	ATGGGTTAGAGTCGAC-1_1	14-Endothelial cell
3BAE2L	ATGGGTTGTGAGCCAA-1_1	9-Fibroblast
3BAE2L	ATGGGTTGTGGACCTC-1_1	6-Macrophage
3BAE2L	ATGGGTTTCGAAATCC-1_1	6-Macrophage
3BAE2L	ATGGGTTTCGCTAGCG-1_1	1-Fibroblast
3BAE2L	ATGGGTTTCGGTCAGC-1_1	2-Epithelial cell
3BAE2L	ATGGGTTTCTACTGCC-1_1	9-Fibroblast
3BAE2L	ATGGGTTTCTTACGTT-1_1	4-Fibroblast
3BAE2L	ATGGTTGCAAGCCATT-1_1	12-NK cell
3BAE2L	ATGGTTGCAATTTCCT-1_1	3-Epithelial cell
3BAE2L	ATGGTTGCAGGTTCAT-1_1	3-Epithelial cell
3BAE2L	ATGGTTGCATATGGCT-1_1	6-Macrophage
3BAE2L	ATGGTTGCATATTCGG-1_1	3-Epithelial cell
3BAE2L	ATGGTTGGTCAGCTTA-1_1	2-Epithelial cell
3BAE2L	ATGGTTGGTCCTATAG-1_1	3-Epithelial cell
3BAE2L	ATGGTTGGTGGGCTCT-1_1	2-Epithelial cell
3BAE2L	ATGGTTGTCGCTGTCT-1_1	2-Epithelial cell
3BAE2L	ATGTCCCAGGGTAATT-1_1	18-T cell
3BAE2L	ATGTCCCAGGTCTGGA-1_1	12-NK cell
3BAE2L	ATGTCCCAGTCTAGCT-1_1	9-Fibroblast
3BAE2L	ATGTCCCCAGAACTCT-1_1	2-Epithelial cell
3BAE2L	ATGTCCCGTAGACAGC-1_1	4-Fibroblast
3BAE2L	ATGTCCCGTATACAGA-1_1	9-Fibroblast
3BAE2L	ATGTCCCGTGCTGCAC-1_1	5-T cell
3BAE2L	ATGTCCCGTTGGAGAC-1_1	6-Macrophage
3BAE2L	ATGTCCCTCATTACCT-1_1	4-Fibroblast
3BAE2L	ATGTCCCTCGAACCAT-1_1	2-Epithelial cell
3BAE2L	ATGTCTTAGACATAGT-1_1	4-Fibroblast
3BAE2L	ATGTCTTAGCGTGTCC-1_1	4-Fibroblast
3BAE2L	ATGTCTTAGGCTAACG-1_1	6-Macrophage
3BAE2L	ATGTCTTCAACAAGTA-1_1	9-Fibroblast
3BAE2L	ATGTCTTGTATTGAGA-1_1	9-Fibroblast
3BAE2L	ATGTCTTGTCATCTAG-1_1	5-T cell
3BAE2L	ATGTCTTTCCAATCTT-1_1	4-Fibroblast
3BAE2L	ATGTCTTTCCTCTCGA-1_1	6-Macrophage
3BAE2L	ATGTCTTTCGCTGACG-1_1	6-Macrophage
3BAE2L	ATGTCTTTCTAGGCCG-1_1	3-Epithelial cell
3BAE2L	ATTACCTAGGCACTAG-1_1	5-T cell
3BAE2L	ATTACCTCAACTCGTA-1_1	15-Empty/Epithelial cell
3BAE2L	ATTACCTGTCGAACAG-1_1	3-Epithelial cell
3BAE2L	ATTACCTTCCATAGGT-1_1	9-Fibroblast
3BAE2L	ATTACTCAGCGTCAGA-1_1	17-B cell
3BAE2L	ATTACTCAGGTCCAGA-1_1	8-Macrophage
3BAE2L	ATTACTCCAGACTGCC-1_1	4-Fibroblast
3BAE2L	ATTACTCCATCGCTGG-1_1	8-Macrophage
3BAE2L	ATTACTCCATGTGGCC-1_1	3-Epithelial cell
3BAE2L	ATTACTCGTACGAGTG-1_1	6-Macrophage
3BAE2L	ATTACTCGTAGGTTTC-1_1	5-T cell
3BAE2L	ATTACTCGTCCAATCA-1_1	6-Macrophage
3BAE2L	ATTACTCGTCCATCTC-1_1	2-Epithelial cell
3BAE2L	ATTACTCGTGCTTCAA-1_1	9-Fibroblast
3BAE2L	ATTACTCGTTGAATCC-1_1	5-T cell
3BAE2L	ATTACTCTCAAAGCCT-1_1	18-T cell
3BAE2L	ATTACTCTCCTTATCA-1_1	6-Macrophage
3BAE2L	ATTATCCAGACGTCCC-1_1	15-Empty/Epithelial cell
3BAE2L	ATTATCCAGAGGTGCT-1_1	4-Fibroblast
3BAE2L	ATTATCCAGCAAGTCG-1_1	4-Fibroblast
3BAE2L	ATTATCCCATTGGCAT-1_1	3-Epithelial cell
3BAE2L	ATTATCCGTACGATGG-1_1	4-Fibroblast
3BAE2L	ATTATCCGTCATAGTC-1_1	13-Macrophage
3BAE2L	ATTATCCGTCCGTACG-1_1	9-Fibroblast
3BAE2L	ATTATCCGTGTGCTTA-1_1	3-Epithelial cell
3BAE2L	ATTATCCTCAAGAATG-1_1	5-T cell
3BAE2L	ATTATCCTCCACCTGT-1_1	3-Epithelial cell
3BAE2L	ATTATCCTCGAGAAGC-1_1	9-Fibroblast
3BAE2L	ATTATCCTCTATGCCC-1_1	5-T cell
3BAE2L	ATTCACTAGCAAGTCG-1_1	5-T cell
3BAE2L	ATTCACTCAGAAGTTA-1_1	2-Epithelial cell
3BAE2L	ATTCACTCATAGGTAA-1_1	2-Epithelial cell
3BAE2L	ATTCACTGTCTGTCCT-1_1	6-Macrophage
3BAE2L	ATTCAGGCACGACGTC-1_1	13-Macrophage
3BAE2L	ATTCAGGCAGTTCTAG-1_1	14-Endothelial cell
3BAE2L	ATTCAGGCATACTTTC-1_1	2-Epithelial cell
3BAE2L	ATTCAGGCATAGTCGT-1_1	19-Epithelial cell
3BAE2L	ATTCAGGGTTGCGAAG-1_1	2-Epithelial cell
3BAE2L	ATTCATCCAACCACGC-1_1	2-Epithelial cell
3BAE2L	ATTCATCCAAGGCCTC-1_1	3-Epithelial cell
3BAE2L	ATTCATCCACTCTCGT-1_1	2-Epithelial cell
3BAE2L	ATTCATCCACTTTATC-1_1	2-Epithelial cell
3BAE2L	ATTCATCCAGTTGGTT-1_1	3-Epithelial cell
3BAE2L	ATTCATCGTAACACCT-1_1	9-Fibroblast
3BAE2L	ATTCATCGTCGCATCG-1_1	9-Fibroblast
3BAE2L	ATTCATCGTGCGAGTA-1_1	2-Epithelial cell
3BAE2L	ATTCATCTCATTATCC-1_1	3-Epithelial cell
3BAE2L	ATTCATCTCCGATCGG-1_1	4-Fibroblast
3BAE2L	ATTCATCTCCTATTTG-1_1	5-T cell
3BAE2L	ATTCATCTCTTCACGC-1_1	4-Fibroblast
3BAE2L	ATTCCATAGCGGTAGT-1_1	6-Macrophage
3BAE2L	ATTCCATCAAACTAAG-1_1	15-Empty/Epithelial cell
3BAE2L	ATTCCATCAGTTGAAA-1_1	4-Fibroblast
3BAE2L	ATTCCATGTCGAAGCA-1_1	19-Epithelial cell
3BAE2L	ATTCCATTCAGAGCGA-1_1	5-T cell
3BAE2L	ATTCCATTCGTAACCA-1_1	12-NK cell
3BAE2L	ATTCCATTCGTCCTTG-1_1	9-Fibroblast
3BAE2L	ATTCCCGAGATTGTGA-1_1	5-T cell
3BAE2L	ATTCCCGAGCAGGCTA-1_1	6-Macrophage
3BAE2L	ATTCCCGAGTATGGCG-1_1	14-Endothelial cell
3BAE2L	ATTCCCGCAATACAGA-1_1	5-T cell
3BAE2L	ATTCCCGCAGAACTAA-1_1	2-Epithelial cell
3BAE2L	ATTCCCGGTAGCGTAG-1_1	2-Epithelial cell
3BAE2L	ATTCCCGGTCGCATTA-1_1	5-T cell
3BAE2L	ATTCCCGGTCTCCTGT-1_1	15-Empty/Epithelial cell
3BAE2L	ATTCCCGGTTATCTGG-1_1	6-Macrophage
3BAE2L	ATTCCCGTCCGTGGTG-1_1	4-Fibroblast
3BAE2L	ATTCCCGTCTACTGCC-1_1	2-Epithelial cell
3BAE2L	ATTCCCGTCTATCGTT-1_1	6-Macrophage
3BAE2L	ATTCCCGTCTTCGTGC-1_1	19-Epithelial cell
3BAE2L	ATTCCTAAGGAATTAC-1_1	4-Fibroblast
3BAE2L	ATTCCTAAGTCGCTAT-1_1	5-T cell
3BAE2L	ATTCCTACATAACCCA-1_1	15-Empty/Epithelial cell
3BAE2L	ATTCCTACATCGGATT-1_1	12-NK cell
3BAE2L	ATTCCTACATGTTACG-1_1	12-NK cell
3BAE2L	ATTCCTACATTCGGGC-1_1	9-Fibroblast
3BAE2L	ATTCCTAGTTGTGTAC-1_1	4-Fibroblast
3BAE2L	ATTCGTTAGCTGTTCA-1_1	6-Macrophage
3BAE2L	ATTCGTTCAGCGGTCT-1_1	4-Fibroblast
3BAE2L	ATTCGTTCATGGGCAA-1_1	2-Epithelial cell
3BAE2L	ATTCGTTGTATCCTCC-1_1	6-Macrophage
3BAE2L	ATTCGTTGTGGTCTCG-1_1	4-Fibroblast
3BAE2L	ATTCGTTGTTTAGAGA-1_1	15-Empty/Epithelial cell
3BAE2L	ATTCTACAGAGTCAGC-1_1	14-Endothelial cell
3BAE2L	ATTCTACAGGGAGGCA-1_1	2-Epithelial cell
3BAE2L	ATTCTACAGGTTCTTG-1_1	2-Epithelial cell
3BAE2L	ATTCTACCACCAGTAT-1_1	12-NK cell
3BAE2L	ATTCTACCAGTAACGG-1_1	17-B cell
3BAE2L	ATTCTACCATGGGTTT-1_1	9-Fibroblast
3BAE2L	ATTCTACGTGCATTTG-1_1	2-Epithelial cell
3BAE2L	ATTCTACTCATGACAC-1_1	6-Macrophage
3BAE2L	ATTCTACTCATTGCGA-1_1	3-Epithelial cell
3BAE2L	ATTCTACTCCTCAGAA-1_1	21-T cell
3BAE2L	ATTCTTGAGACCACGA-1_1	3-Epithelial cell
3BAE2L	ATTCTTGAGCAAGTGC-1_1	9-Fibroblast
3BAE2L	ATTCTTGAGCACGATG-1_1	14-Endothelial cell
3BAE2L	ATTCTTGAGTGAGTGC-1_1	3-Epithelial cell
3BAE2L	ATTCTTGCACATACTG-1_1	6-Macrophage
3BAE2L	ATTCTTGCATACAGGG-1_1	3-Epithelial cell
3BAE2L	ATTCTTGCATATACCG-1_1	9-Fibroblast
3BAE2L	ATTCTTGGTACGACAG-1_1	2-Epithelial cell
3BAE2L	ATTCTTGGTGCTGCAC-1_1	10-Fibroblast
3BAE2L	ATTGGGTAGGTCCAGA-1_1	6-Macrophage
3BAE2L	ATTGGGTAGTACGAGC-1_1	5-T cell
3BAE2L	ATTGGGTAGTCCGCCA-1_1	3-Epithelial cell
3BAE2L	ATTGGGTAGTGTCATC-1_1	18-T cell
3BAE2L	ATTGGGTGTAATGCTC-1_1	4-Fibroblast
3BAE2L	ATTGGGTGTCAAACGG-1_1	2-Epithelial cell
3BAE2L	ATTGGGTTCGTCGCTT-1_1	2-Epithelial cell
3BAE2L	ATTGGGTTCTCCTGTG-1_1	6-Macrophage
3BAE2L	ATTGTTCAGCAGCGAT-1_1	13-Macrophage
3BAE2L	ATTGTTCCAATAACCC-1_1	2-Epithelial cell
3BAE2L	ATTGTTCCAATGACCT-1_1	6-Macrophage
3BAE2L	ATTGTTCCACTAACCA-1_1	5-T cell
3BAE2L	ATTGTTCCAGCAGTTT-1_1	6-Macrophage
3BAE2L	ATTGTTCGTCAGCTTA-1_1	12-NK cell
3BAE2L	ATTGTTCGTCGCAACC-1_1	5-T cell
3BAE2L	ATTGTTCGTGCGTCGT-1_1	4-Fibroblast
3BAE2L	ATTTACCGTAGGGTAC-1_1	3-Epithelial cell
3BAE2L	ATTTACCGTCTACACA-1_1	2-Epithelial cell
3BAE2L	ATTTACCTCCACACCT-1_1	15-Empty/Epithelial cell
3BAE2L	ATTTACCTCTCTCAAT-1_1	5-T cell
3BAE2L	ATTTACCTCTGGTGGC-1_1	3-Epithelial cell
3BAE2L	ATTTCACAGACTAGAT-1_1	17-B cell
3BAE2L	ATTTCACAGTGCCGAA-1_1	15-Empty/Epithelial cell
3BAE2L	ATTTCACCACTTCCTG-1_1	17-B cell
3BAE2L	ATTTCACCATTGCTTT-1_1	23-Macrophage
3BAE2L	ATTTCACGTATACAGA-1_1	5-T cell
3BAE2L	ATTTCACTCCTGTACC-1_1	14-Endothelial cell
3BAE2L	ATTTCTGAGGACAGCT-1_1	19-Epithelial cell
3BAE2L	ATTTCTGAGGCATTTC-1_1	2-Epithelial cell
3BAE2L	ATTTCTGCAAGACGAC-1_1	5-T cell
3BAE2L	ATTTCTGCAAGATTGA-1_1	3-Epithelial cell
3BAE2L	ATTTCTGCACTAGGCC-1_1	6-Macrophage
3BAE2L	ATTTCTGGTAGTCGTT-1_1	3-Epithelial cell
3BAE2L	ATTTCTGTCAAGCTTG-1_1	2-Epithelial cell
3BAE2L	CAAAGAAAGTCACTCA-1_1	5-T cell
3BAE2L	CAAAGAACAAAGCGTG-1_1	2-Epithelial cell
3BAE2L	CAAAGAAGTGACGCCT-1_1	14-Endothelial cell
3BAE2L	CAAAGAAGTGATAGAT-1_1	2-Epithelial cell
3BAE2L	CAAAGAAGTTAGGGTG-1_1	5-T cell
3BAE2L	CAAAGAATCATTCCTA-1_1	9-Fibroblast
3BAE2L	CAAAGAATCTAGGCAT-1_1	9-Fibroblast
3BAE2L	CAACAACAGATCCGAG-1_1	4-Fibroblast
3BAE2L	CAACAACCAACCAACT-1_1	9-Fibroblast
3BAE2L	CAACAACCAAGATGTA-1_1	3-Epithelial cell
3BAE2L	CAACAACCACCCAAGC-1_1	6-Macrophage
3BAE2L	CAACAACGTCAGTCCG-1_1	2-Epithelial cell
3BAE2L	CAACAACGTGTCATGT-1_1	19-Epithelial cell
3BAE2L	CAACAACGTGTGAGCA-1_1	6-Macrophage
3BAE2L	CAACAACGTTCGGTTA-1_1	18-T cell
3BAE2L	CAACAACTCCACCCTA-1_1	2-Epithelial cell
3BAE2L	CAACAGTAGGGTGAAA-1_1	2-Epithelial cell
3BAE2L	CAACAGTAGTACGTCT-1_1	2-Epithelial cell
3BAE2L	CAACAGTCAATAAGGT-1_1	4-Fibroblast
3BAE2L	CAACAGTCAGAGTTCT-1_1	5-T cell
3BAE2L	CAACAGTCAGCGTTGC-1_1	6-Macrophage
3BAE2L	CAACAGTCATCGCCTT-1_1	5-T cell
3BAE2L	CAACAGTGTAGCGATG-1_1	2-Epithelial cell
3BAE2L	CAACAGTGTGAGATTA-1_1	2-Epithelial cell
3BAE2L	CAACAGTGTTGTCAGT-1_1	4-Fibroblast
3BAE2L	CAACAGTTCCTCACGT-1_1	18-T cell
3BAE2L	CAACAGTTCGGTGCAC-1_1	6-Macrophage
3BAE2L	CAACAGTTCTCCGATC-1_1	2-Epithelial cell
3BAE2L	CAACCAAAGAAATTGC-1_1	19-Epithelial cell
3BAE2L	CAACCAAAGAGTCCGA-1_1	2-Epithelial cell
3BAE2L	CAACCAAAGCCTGAGA-1_1	13-Macrophage
3BAE2L	CAACCAAAGGAGACCT-1_1	2-Epithelial cell
3BAE2L	CAACCAACATAGAAAC-1_1	9-Fibroblast
3BAE2L	CAACCAAGTTGACGGA-1_1	13-Macrophage
3BAE2L	CAACCAATCAGACCCG-1_1	5-T cell
3BAE2L	CAACCAATCCATGATG-1_1	5-T cell
3BAE2L	CAACCAATCTTCGGAA-1_1	4-Fibroblast
3BAE2L	CAACCTCAGACCATAA-1_1	18-T cell
3BAE2L	CAACCTCAGGCATGGT-1_1	20-Macrophage
3BAE2L	CAACCTCCAACCTAAC-1_1	3-Epithelial cell
3BAE2L	CAACCTCCACTAGGTT-1_1	3-Epithelial cell
3BAE2L	CAACCTCCATGAAAGT-1_1	2-Epithelial cell
3BAE2L	CAACCTCGTAGACAGC-1_1	2-Epithelial cell
3BAE2L	CAACCTCGTATGAAAC-1_1	6-Macrophage
3BAE2L	CAACCTCTCATGACAC-1_1	17-B cell
3BAE2L	CAACCTCTCCATAGAC-1_1	5-T cell
3BAE2L	CAACGATCAGCTACAT-1_1	4-Fibroblast
3BAE2L	CAACGATGTACCTGTA-1_1	13-Macrophage
3BAE2L	CAACGATTCCTACACC-1_1	3-Epithelial cell
3BAE2L	CAACGATTCGCTGTTC-1_1	9-Fibroblast
3BAE2L	CAACGATTCTCATGCC-1_1	2-Epithelial cell
3BAE2L	CAACGATTCTTCGGTC-1_1	9-Fibroblast
3BAE2L	CAACGGCAGACTCTTG-1_1	2-Epithelial cell
3BAE2L	CAACGGCAGATCGACG-1_1	2-Epithelial cell
3BAE2L	CAACGGCAGGTAGATT-1_1	5-T cell
3BAE2L	CAACGGCAGTTGGACG-1_1	18-T cell
3BAE2L	CAACGGCCAGGCATTT-1_1	6-Macrophage
3BAE2L	CAACGGCCAGGTCAAG-1_1	4-Fibroblast
3BAE2L	CAACGGCCAGTTTCAG-1_1	13-Macrophage
3BAE2L	CAACGGCGTTGCCAAT-1_1	9-Fibroblast
3BAE2L	CAACGGCTCGTACACA-1_1	5-T cell
3BAE2L	CAACGGCTCTGTGCTC-1_1	6-Macrophage
3BAE2L	CAAGACTAGAAGCGCT-1_1	17-B cell
3BAE2L	CAAGACTAGAATCGAT-1_1	3-Epithelial cell
3BAE2L	CAAGACTAGCGCCTTG-1_1	2-Epithelial cell
3BAE2L	CAAGACTAGTGGTGAC-1_1	2-Epithelial cell
3BAE2L	CAAGACTCAGGATGAC-1_1	3-Epithelial cell
3BAE2L	CAAGACTTCAACACCA-1_1	3-Epithelial cell
3BAE2L	CAAGACTTCGGAAACG-1_1	3-Epithelial cell
3BAE2L	CAAGACTTCGGACGTC-1_1	2-Epithelial cell
3BAE2L	CAAGAGGAGCCGGAAT-1_1	18-T cell
3BAE2L	CAAGAGGAGGTTCATC-1_1	4-Fibroblast
3BAE2L	CAAGAGGAGTAGTCCT-1_1	9-Fibroblast
3BAE2L	CAAGAGGCACACGTGC-1_1	5-T cell
3BAE2L	CAAGAGGCACAGTGAG-1_1	6-Macrophage
3BAE2L	CAAGAGGCACTCTCGT-1_1	4-Fibroblast
3BAE2L	CAAGAGGCAGAAACCG-1_1	5-T cell
3BAE2L	CAAGAGGCAGGCGAAT-1_1	2-Epithelial cell
3BAE2L	CAAGAGGGTAGTATAG-1_1	5-T cell
3BAE2L	CAAGAGGGTTCCGTTC-1_1	3-Epithelial cell
3BAE2L	CAAGAGGGTTCCTAAG-1_1	4-Fibroblast
3BAE2L	CAAGAGGTCATTGCCC-1_1	9-Fibroblast
3BAE2L	CAAGAGGTCCAGCCTT-1_1	4-Fibroblast
3BAE2L	CAAGAGGTCCTAGAGT-1_1	3-Epithelial cell
3BAE2L	CAAGCTAAGCACCGTC-1_1	2-Epithelial cell
3BAE2L	CAAGCTAAGGACTAAT-1_1	9-Fibroblast
3BAE2L	CAAGCTAAGTACTGGG-1_1	2-Epithelial cell
3BAE2L	CAAGCTAAGTCGGCAA-1_1	3-Epithelial cell
3BAE2L	CAAGCTACATACCATG-1_1	18-T cell
3BAE2L	CAAGCTAGTACATTGC-1_1	2-Epithelial cell
3BAE2L	CAAGCTAGTTCTGAGT-1_1	19-Epithelial cell
3BAE2L	CAAGCTATCAAGTCTG-1_1	4-Fibroblast
3BAE2L	CAAGCTATCGGAACTT-1_1	18-T cell
3BAE2L	CAAGCTATCTTCCCAG-1_1	3-Epithelial cell
3BAE2L	CAAGGGAAGCATTGTC-1_1	2-Epithelial cell
3BAE2L	CAAGGGAAGGTCCCTG-1_1	5-T cell
3BAE2L	CAAGGGAAGTATGTAG-1_1	13-Macrophage
3BAE2L	CAAGGGAGTAATCAGA-1_1	12-NK cell
3BAE2L	CAAGGGAGTACCTAGT-1_1	13-Macrophage
3BAE2L	CAAGGGATCTCATGGA-1_1	4-Fibroblast
3BAE2L	CAATACGAGACCTCCG-1_1	5-T cell
3BAE2L	CAATACGAGAGATTCA-1_1	2-Epithelial cell
3BAE2L	CAATACGCATTGAAGA-1_1	3-Epithelial cell
3BAE2L	CAATACGGTTCAAAGA-1_1	9-Fibroblast
3BAE2L	CAATACGTCAAGAATG-1_1	9-Fibroblast
3BAE2L	CAATACGTCAAGCCAT-1_1	3-Epithelial cell
3BAE2L	CAATACGTCATCGTAG-1_1	2-Epithelial cell
3BAE2L	CAATCGAAGCATTGTC-1_1	5-T cell
3BAE2L	CAATCGAAGGTCTACT-1_1	3-Epithelial cell
3BAE2L	CAATCGAAGTGCAGGT-1_1	5-T cell
3BAE2L	CAATCGACACCATTCC-1_1	9-Fibroblast
3BAE2L	CAATCGACACGTTCGG-1_1	2-Epithelial cell
3BAE2L	CAATCGAGTTATGACC-1_1	2-Epithelial cell
3BAE2L	CAATCGATCAACTCTT-1_1	5-T cell
3BAE2L	CAATCGATCACCCATC-1_1	15-Empty/Epithelial cell
3BAE2L	CAATCGATCACCGGGT-1_1	6-Macrophage
3BAE2L	CAATCGATCCCGGTAG-1_1	4-Fibroblast
3BAE2L	CAATCGATCCGATAAC-1_1	17-B cell
3BAE2L	CAATCGATCGGTTAGT-1_1	3-Epithelial cell
3BAE2L	CAATGACAGAGAAGGT-1_1	5-T cell
3BAE2L	CAATGACAGCCTTGAT-1_1	2-Epithelial cell
3BAE2L	CAATGACCAAAGCACG-1_1	4-Fibroblast
3BAE2L	CAATGACGTACAGAGC-1_1	3-Epithelial cell
3BAE2L	CAATGACGTGCCTATA-1_1	2-Epithelial cell
3BAE2L	CAATGACTCACCATCC-1_1	18-T cell
3BAE2L	CAATTTCAGACATCCT-1_1	6-Macrophage
3BAE2L	CAATTTCAGGGAACAA-1_1	2-Epithelial cell
3BAE2L	CAATTTCCAGAGTGTG-1_1	15-Empty/Epithelial cell
3BAE2L	CAATTTCCAGGATGAC-1_1	4-Fibroblast
3BAE2L	CAATTTCCATAATCGC-1_1	9-Fibroblast
3BAE2L	CAATTTCCATTAAAGG-1_1	3-Epithelial cell
3BAE2L	CAATTTCGTGAGCAGT-1_1	6-Macrophage
3BAE2L	CAATTTCGTGAGTTTC-1_1	4-Fibroblast
3BAE2L	CAATTTCTCATTGCTT-1_1	3-Epithelial cell
3BAE2L	CACAACAAGACCTCCG-1_1	2-Epithelial cell
3BAE2L	CACAACAAGATGAACT-1_1	18-T cell
3BAE2L	CACAACAAGCGGGTTA-1_1	21-T cell
3BAE2L	CACAACACATCATGAC-1_1	4-Fibroblast
3BAE2L	CACAACAGTAACATCC-1_1	3-Epithelial cell
3BAE2L	CACAACAGTACGAGCA-1_1	2-Epithelial cell
3BAE2L	CACAACAGTGTTCATG-1_1	2-Epithelial cell
3BAE2L	CACAACAGTTAGAGTA-1_1	2-Epithelial cell
3BAE2L	CACACAACAAGGATGC-1_1	3-Epithelial cell
3BAE2L	CACACAACAGGCACTC-1_1	5-T cell
3BAE2L	CACACAACATAGATGA-1_1	2-Epithelial cell
3BAE2L	CACACAACATGGCTGC-1_1	14-Endothelial cell
3BAE2L	CACACAAGTAGTATAG-1_1	9-Fibroblast
3BAE2L	CACACAAGTCCACTCT-1_1	19-Epithelial cell
3BAE2L	CACACAAGTCGAGATG-1_1	3-Epithelial cell
3BAE2L	CACACAAGTGTCATCA-1_1	2-Epithelial cell
3BAE2L	CACACAAGTGTTCCTC-1_1	4-Fibroblast
3BAE2L	CACACAAGTTCGAAGG-1_1	5-T cell
3BAE2L	CACACAATCCTACGAA-1_1	2-Epithelial cell
3BAE2L	CACACAATCGTGCATA-1_1	2-Epithelial cell
3BAE2L	CACAGATAGTTCTCTT-1_1	4-Fibroblast
3BAE2L	CACAGATCACTTTAGG-1_1	3-Epithelial cell
3BAE2L	CACAGATGTGCCGTTG-1_1	2-Epithelial cell
3BAE2L	CACAGATTCACCTGGG-1_1	4-Fibroblast
3BAE2L	CACAGATTCGGCATAT-1_1	5-T cell
3BAE2L	CACAGATTCGGTCATA-1_1	9-Fibroblast
3BAE2L	CACAGATTCTGCGGGT-1_1	3-Epithelial cell
3BAE2L	CACAGGCAGATAGGGA-1_1	2-Epithelial cell
3BAE2L	CACAGGCAGCGCAATG-1_1	3-Epithelial cell
3BAE2L	CACAGGCCAAAGGAGA-1_1	9-Fibroblast
3BAE2L	CACAGGCCAACAGCTT-1_1	14-Endothelial cell
3BAE2L	CACAGGCCAACGTTAC-1_1	5-T cell
3BAE2L	CACAGGCCACCGCTGA-1_1	6-Macrophage
3BAE2L	CACAGGCCACGTAACT-1_1	6-Macrophage
3BAE2L	CACAGGCCAGAAGCGT-1_1	2-Epithelial cell
3BAE2L	CACAGGCGTACCCGAC-1_1	14-Endothelial cell
3BAE2L	CACAGGCTCGGCTTGG-1_1	14-Endothelial cell
3BAE2L	CACATGAAGAGTCGAC-1_1	15-Empty/Epithelial cell
3BAE2L	CACATGACATAGATCC-1_1	6-Macrophage
3BAE2L	CACATGAGTATGGTAA-1_1	12-NK cell
3BAE2L	CACATGAGTCCCTCAT-1_1	4-Fibroblast
3BAE2L	CACATGAGTGATTCTG-1_1	12-NK cell
3BAE2L	CACATGATCTGATGGT-1_1	3-Epithelial cell
3BAE2L	CACCAAAAGACTCTTG-1_1	2-Epithelial cell
3BAE2L	CACCAAAAGAGTTGTA-1_1	5-T cell
3BAE2L	CACCAAAAGGCTTAGG-1_1	4-Fibroblast
3BAE2L	CACCAAAAGTCTCTGA-1_1	3-Epithelial cell
3BAE2L	CACCAAACATCCTCAC-1_1	2-Epithelial cell
3BAE2L	CACCAAAGTACTGCCG-1_1	2-Epithelial cell
3BAE2L	CACCAAAGTCGCCTAG-1_1	18-T cell
3BAE2L	CACCAAAGTTGCCTAA-1_1	3-Epithelial cell
3BAE2L	CACCGTTAGATGGTAT-1_1	9-Fibroblast
3BAE2L	CACCGTTAGTATGGCG-1_1	2-Epithelial cell
3BAE2L	CACCGTTCAACGATCT-1_1	3-Epithelial cell
3BAE2L	CACCGTTGTGGGTCAA-1_1	6-Macrophage
3BAE2L	CACCGTTGTTCAGCTA-1_1	2-Epithelial cell
3BAE2L	CACCGTTTCCCGGTAG-1_1	4-Fibroblast
3BAE2L	CACCGTTTCCCGTTGT-1_1	5-T cell
3BAE2L	CACCGTTTCTACAGGT-1_1	2-Epithelial cell
3BAE2L	CACGAATAGCTGGCCT-1_1	2-Epithelial cell
3BAE2L	CACGAATCATGAAGGC-1_1	14-Endothelial cell
3BAE2L	CACGAATGTACTCAAC-1_1	2-Epithelial cell
3BAE2L	CACGAATGTCCAACGC-1_1	2-Epithelial cell
3BAE2L	CACGAATGTCTTCCGT-1_1	4-Fibroblast
3BAE2L	CACGAATTCACAACCA-1_1	15-Empty/Epithelial cell
3BAE2L	CACGAATTCATAAGGA-1_1	3-Epithelial cell
3BAE2L	CACGAATTCCAACCGG-1_1	2-Epithelial cell
3BAE2L	CACGAATTCCCACAGG-1_1	5-T cell
3BAE2L	CACGAATTCCTCGATC-1_1	15-Empty/Epithelial cell
3BAE2L	CACGAATTCTCATTTG-1_1	5-T cell
3BAE2L	CACGGGTCAAAGTGTA-1_1	4-Fibroblast
3BAE2L	CACGGGTCAAGAGAGA-1_1	4-Fibroblast
3BAE2L	CACGGGTGTGTCCATA-1_1	12-NK cell
3BAE2L	CACGGGTTCGTTCTCG-1_1	15-Empty/Epithelial cell
3BAE2L	CACGTGGAGCTCTTCC-1_1	4-Fibroblast
3BAE2L	CACGTGGAGTCCGCCA-1_1	5-T cell
3BAE2L	CACGTGGCAGAGGTTG-1_1	12-NK cell
3BAE2L	CACGTGGGTACTCGAT-1_1	6-Macrophage
3BAE2L	CACGTGGGTGCCTATA-1_1	3-Epithelial cell
3BAE2L	CACGTGGGTGTATTCG-1_1	6-Macrophage
3BAE2L	CACGTGGTCGCGAAGA-1_1	5-T cell
3BAE2L	CACGTTCAGATTGCGG-1_1	9-Fibroblast
3BAE2L	CACGTTCAGCGTTGTT-1_1	9-Fibroblast
3BAE2L	CACGTTCAGCTTTCCC-1_1	2-Epithelial cell
3BAE2L	CACGTTCCAACGATCT-1_1	3-Epithelial cell
3BAE2L	CACGTTCCAGGACTAG-1_1	3-Epithelial cell
3BAE2L	CACGTTCCAGGCCTGT-1_1	12-NK cell
3BAE2L	CACGTTCGTATCGCTA-1_1	6-Macrophage
3BAE2L	CACGTTCGTGTATTCG-1_1	2-Epithelial cell
3BAE2L	CACGTTCTCCGACGGT-1_1	2-Epithelial cell
3BAE2L	CACGTTCTCCTCGATC-1_1	2-Epithelial cell
3BAE2L	CACGTTCTCGTAGCTA-1_1	5-T cell
3BAE2L	CACGTTCTCTCGCAGG-1_1	9-Fibroblast
3BAE2L	CACGTTCTCTTGCAGA-1_1	4-Fibroblast
3BAE2L	CACTAAGAGGCCCGTT-1_1	6-Macrophage
3BAE2L	CACTAAGAGTCATCCA-1_1	12-NK cell
3BAE2L	CACTAAGCAACCACAT-1_1	20-Macrophage
3BAE2L	CACTAAGCACATTACG-1_1	14-Endothelial cell
3BAE2L	CACTAAGGTAAGAACT-1_1	2-Epithelial cell
3BAE2L	CACTAAGGTAAGTTAG-1_1	2-Epithelial cell
3BAE2L	CACTGAAAGCTGTGCC-1_1	13-Macrophage
3BAE2L	CACTGAAAGTAACGAT-1_1	2-Epithelial cell
3BAE2L	CACTGAACACTACTTT-1_1	4-Fibroblast
3BAE2L	CACTGAACATTGGGAG-1_1	4-Fibroblast
3BAE2L	CACTGAAGTCAACGCC-1_1	5-T cell
3BAE2L	CACTGAAGTCGAATTC-1_1	3-Epithelial cell
3BAE2L	CACTGAATCTGCGTCT-1_1	2-Epithelial cell
3BAE2L	CACTGGGAGATTGGGC-1_1	14-Endothelial cell
3BAE2L	CACTGGGCAGAACTCT-1_1	2-Epithelial cell
3BAE2L	CACTGGGCATCGTGCG-1_1	5-T cell
3BAE2L	CACTGGGGTGAGTAGC-1_1	5-T cell
3BAE2L	CACTGGGGTGCTGTCG-1_1	18-T cell
3BAE2L	CACTGGGGTGGCTTGC-1_1	9-Fibroblast
3BAE2L	CACTGGGTCCGGCAAC-1_1	6-Macrophage
3BAE2L	CACTGGGTCCTATTTG-1_1	14-Endothelial cell
3BAE2L	CACTGTCAGGCCACCT-1_1	2-Epithelial cell
3BAE2L	CACTGTCCAAGATTGA-1_1	9-Fibroblast
3BAE2L	CACTGTCCACTACAGT-1_1	3-Epithelial cell
3BAE2L	CACTGTCCATCGTTCC-1_1	3-Epithelial cell
3BAE2L	CACTGTCGTCATCCGG-1_1	5-T cell
3BAE2L	CACTGTCTCTTCTCAA-1_1	9-Fibroblast
3BAE2L	CACTTCGAGGGCAGTT-1_1	12-NK cell
3BAE2L	CACTTCGAGTCACAGG-1_1	3-Epithelial cell
3BAE2L	CACTTCGAGTGAATAC-1_1	2-Epithelial cell
3BAE2L	CACTTCGCACCCTAGG-1_1	4-Fibroblast
3BAE2L	CACTTCGCATCAGCAT-1_1	4-Fibroblast
[truncated: 11,648 more rows]

## Sheet: Table S5
Table S5. Resistant signature genes after COMET analysis
gene_1	mHG_stat	mHG_pval	mHG_cutoff	cutoff_val	t_stat	t_pval	ws_stat	ws_pval	Log2FoldChange	Log2FoldChangeAbs	TN	TP	q_value	hgrank	fcrank	rank	Plot
IGHGP	0	0	15880	0.001	84.3983	0	681450	0	2.44019	2.44019	0.925721	0.414351	0	3	10	1	1
PTGDS	0	0	12696	0.001	76.1517	0	681450	0	2.50351	2.50351	0.935444	0.326102	0	8	9	2	1
SLPI	0	0	13706	0.694147	90.504	0	681450	0	1.9276	1.9276	0.920767	0.342503	0	2	16	3	1
CTHRC1	0	0	9399	0.001	78.5417	0	681450	0	3.50294	3.50294	0.968276	0.257485	0	16	3	4	1
MMP7	0	0	10618	0.001	67.9097	0	681450	0	2.60775	2.60775	0.948552	0.27527	0	18	7	5	1
WFDC2	0	0	26925	0.001	86.1108	0	681450	0	1.62043	1.62043	0.778978	0.607465	0	1	28	6	1
INHBA	0	0	5413	0.694147	71.9478	0	681450	0	2.96087	2.96087	0.98363	0.150189	0	25	5	7	1
KIF26B	0	0	9987	0.001	68.1794	0	681450	0	2.54008	2.54008	0.949414	0.256716	0	22	8	8	1
TIMP3	0	0	15807	0.001	68.7741	0	681450	0	1.77573	1.77573	0.884858	0.371242	0	10	22	9	1
NNMT	0	0	17087	0.001	71.974	0	681450	0	1.69486	1.69486	0.876273	0.402043	0	7	26	10	1
KRT8	0	0	12702	0.694147	71.5889	0	681450	0	1.51734	1.51734	0.89932	0.290163	0	5	33	11	1
BGN	0	0	8919	0.694147	65.9673	0	681450	0	1.80378	1.80378	0.941475	0.215914	0	17	21	12	1
COL8A1	0	0	8173	0.001	66.6021	0	681450	0	2.81226	2.81226	0.967076	0.218561	0	33	6	13	1
PCDH7	0	0	11813	0.001	60.3267	0	681450	0	1.83038	1.83038	0.925382	0.28887	0	21	18	14	1
LUM	0	0	13879	0.001	69.0778	0	681450	0	2.02073	2.02073	0.904028	0.331087	0	27	14	15	1
KRT17	0	0	8871	0.001	57.5443	0	681450	0	2.34283	2.34283	0.958399	0.231361	0	30	11	16	1
MMP11	0	0	7704	0.001	67.7365	0	681450	0	4.19409	4.19409	0.978738	0.215791	0	46	2	17	1
KRT18	0	0	13661	0.694147	70.843	0	681450	0	1.42074	1.42074	0.888858	0.30921	0	6	43	18	1
THBS2	0	0	9589	0.001	60.0744	0	681450	0	2.09382	2.09382	0.934798	0.229853	0	37	12	19	1
KRT7	0	0	12987	0.001	60.0953	0	681450	0	1.7237	1.7237	0.902674	0.302286	0	29	24	20	1
HES1	0	0	9076	0.694147	58.6689	0	681450	0	1.47422	1.47422	0.924982	0.204252	0	15	39	21	1
COMP	0	0	5375	0.001	65.5379	0	681450	0	4.86636	4.86636	0.993231	0.15862	0	54	1	22	1
FAP	0	0	5507	0.001	58.4551	0	681450	0	3.37886	3.37886	0.983692	0.153143	0	51	4	23	1
PLAU	0	0	10160	0.001	52.4475	0	681450	0	1.74844	1.74844	0.926829	0.239454	0	36	23	24	1
SPP1	0	0	14222	0.694147	62.6115	0	681450	0	1.37604	1.37604	0.880027	0.317641	0	11	49	25	1
CLDN3	0	0	13754	0.001	54.0594	0	681450	0	1.46601	1.46601	0.894643	0.317856	0	20	41	26	1
IGF2BP2	0	0	8348	0.694147	57.3321	0	681450	0	1.48391	1.48391	0.933383	0.190252	0	26	38	27	1
MSLN	0	0	8815	0.001	49.7683	0	681450	0	1.71922	1.71922	0.942829	0.214068	0	43	25	28	1
RARRES2	0	0	15451	0.694147	67.3318	0	681450	0	1.24056	1.24056	0.866427	0.341857	0	4	67	29	1
MMP14	0	0	11838	0.001	54.0069	0	681450	0	1.5433	1.5433	0.89732	0.261577	0	41	32	30	1
CD24	0	0	14034	0.001	51.9994	0	681450	0	1.41396	1.41396	0.88335	0.315179	0	28	46	31	1
SULF1	0	0	8497	0.001	47.5202	0	681450	0	1.81658	1.81658	0.937813	0.199268	0	55	20	32	1
LOXL1	0	0	7114	0.001	48.7659	0	681450	0	1.86641	1.86641	0.953229	0.172128	0	59	17	33	1
EPCAM	0	0	12527	0.001	51.7079	0	681450	0	1.41932	1.41932	0.897597	0.283055	0	32	44	34	1
TM4SF1	0	0	11006	0.694147	56.3646	0	681450	0	1.25493	1.25493	0.904059	0.242715	0	12	66	35	1
FN1	0	0	16773	1.09961	75.518	0	681450	0	1.23014	1.23014	0.859319	0.375427	0	9	71	36	1
C6ORF132	0	0	6806	0.001	49.1801	0	681450	0	2.0166	2.0166	0.956399	0.16582	0	66	15	37	1
CHI3L1	0	0	6416	0.001	46.3994	0	681450	0	2.0937	2.0937	0.961568	0.15899	0	68	13	38	1
PAX8	0	0	11376	0.001	46.7153	0	681450	0	1.40377	1.40377	0.910859	0.2609	0	35	47	39	1
LINC00511	0	0	8920	0.001	43.0597	0	681450	0	1.50115	1.50115	0.936767	0.211237	0	49	36	40	1
CRIP2	0	0	15504	0.001	52.3864	0	681450	0	1.24014	1.24014	0.870211	0.347272	0	19	68	41	1
DCDC2	0	0	7175	0.001	45.768	0	681450	0	1.81968	1.81968	0.952491	0.173267	0	71	19	42	1
RHPN2	0	0	8036	0.001	44.1527	0	681450	0	1.56507	1.56507	0.941783	0.189052	0	60	30	43	1
KIAA1217	0	0	12820	0.694147	58.4489	0	681450	0	1.19404	1.19404	0.88895	0.283424	0	14	78	44	1
FOLR1	0	0	7835	0.001	40.3615	0	681450	0	1.51311	1.51311	0.944337	0.185421	0	58	35	45	1
C1QB	0	0	18068	0.001	51.2748	0	681450	0	1.23107	1.23107	0.824118	0.380073	0	23	70	46	1
AEBP1	0	0	8792	0.694147	48.7592	0	681450	0	1.29261	1.29261	0.923628	0.19416	0	34	61	47	1
THY1	0	0	11193	0.001	43.7872	0	681450	0	1.31489	1.31489	0.909751	0.254162	0	38	57	48	1
TACSTD2	0	0	8582	0.001	42.7336	0	681450	0	1.58704	1.58704	0.928952	0.193021	0	67	29	49	1
TNNT1	0	0	6695	0.001	42.6639	0	681450	0	1.66999	1.66999	0.953106	0.159113	0	72	27	50	1
CCND1	0	0	10185	0.001	43.9873	0	681450	0	1.34046	1.34046	0.919013	0.232407	0	45	54	51	1
CXADR	0	0	7406	0.001	42.2833	0	681450	0	1.54746	1.54746	0.944798	0.172682	0	69	31	52	1
ERBB4	0	0	9090	0.001	39.6211	0	681450	0	1.41868	1.41868	0.927844	0.207545	0	56	45	53	1
CD9	0	0	16478	0.694147	65.4714	0	681450	0	1.06261	1.06261	0.84138	0.348411	0	13	89	54	1
CRYAB	0	0	9353	0.001	38.8753	0	681450	0	1.47171	1.47171	0.918828	0.206622	0	62	40	55	1
S100A1	0	0	7621	0.001	39.9794	0	681450	0	1.51718	1.51718	0.93649	0.17099	0	73	34	56	1
H19	0	0	11945	0.001	43.2392	0	681450	0	1.25972	1.25972	0.89452	0.26207	0	42	65	57	1
WWC1	0	0	9456	0.001	41.8116	0	681450	0	1.37436	1.37436	0.922613	0.213576	0	57	50	58	1
ITGB5	0	0	11271	0.001	39.9324	0	681450	0	1.11226	1.11226	0.894428	0.241238	0	24	84	59	1
PCOLCE	0	0	10563	0.001	43.4001	0	681450	0	1.33168	1.33168	0.905874	0.230899	0	53	56	60	1
UGT2B7	0	0	7058	0.001	37.3738	6.29349e-302	681450	0	1.49272	1.49272	0.947168	0.164344	0	74	37	61	1
CLDN7	0	0	8267	0.001	40.4393	0	681450	0	1.42596	1.42596	0.931044	0.185421	0	70	42	62	1
CLDN4	0	0	10933	0.001	42.5833	0	681450	0	1.35282	1.35282	0.89772	0.23413	0	61	51	63	1
TGFBI	0	0	16160	0.001	48.0958	0	681450	0	1.14234	1.14234	0.837964	0.33521	0	31	82	64	1
ELF3	0	0	11359	0.001	43.1136	0	681450	0	1.28972	1.28972	0.901105	0.250623	0	52	62	65	1
CCN1	0	0	10192	0.694147	51.1339	0	681450	0	1.20636	1.20636	0.91012	0.22373	0	40	76	66	1
CAVIN3	0	0	11323	0.001	44.0223	0	681450	0	1.21559	1.21559	0.898551	0.246961	0	48	73	67	1
LCN2	0	0	8585	0.001	35.1983	1.44027e-268	681450	0	1.30605	1.30605	0.931813	0.195975	0	64	58	68	1
RHEX	0	0	10717	0.694147	45.3123	0	681450	0	1.18869	1.18869	0.903905	0.233669	0	44	80	69	1
C1QA	0	0	11672	0.694147	46.7223	0	681450	0	1.09299	1.09299	0.890643	0.249792	0	39	86	70	1
CXCL2	0	0	11577	0.001	39.3859	0	681450	0	1.19791	1.19791	0.895566	0.251792	0	50	77	71	1
CFB	0	0	9862	0.001	42.4433	0	681450	0	1.38609	1.38609	0.916028	0.219484	0	80	48	72	1
CP	0	0	7962	0.001	35.3146	2.89106e-270	681450	0	1.30475	1.30475	0.931936	0.176929	0	75	59	73	1
EHF	0	0	6786	0.001	34.4349	3.79967e-257	681450	0	1.34902	1.34902	0.942091	0.150897	0	81	53	74	1
CLU	0	0	10270	0.694147	45.1433	0	681450	0	1.05011	1.05011	0.891381	0.207391	0	47	90	75	1
SOX17	0	0	7153	0.001	34.3116	1.80076e-255	681450	0	1.29632	1.29632	0.942429	0.162528	0	77	60	76	1
PHLDA2	0	0	7884	0.001	36.15	5.01351e-283	681450	0	1.27022	1.27022	0.932798	0.17539	0	76	63	77	1
CLDN1	5.61051e-308	1.54996e-303	7219	0.001	33.6117	3.94681e-245	681450	0	1.34956	1.34956	0.934521	0.156651	1.08299e-302	88	52	78	1
EMX2	0	0	7302	0.001	35.5116	2.40611e-273	681450	0	1.26759	1.26759	0.938644	0.163328	0	78	64	79	1
ASRGL1	1.14521e-307	3.16376e-303	7140	0.001	34.5199	2.4655e-258	681450	0	1.33384	1.33384	0.935506	0.155205	2.19247e-302	89	55	80	1
TREM2	0	0	7987	0.001	35.1396	1.19294e-267	681450	0	1.23493	1.23493	0.927475	0.173236	0	79	69	81	1
ITGB8	0	0	11864	0.001	37.5217	1.72689e-304	681450	0	1.10431	1.10431	0.881073	0.246131	0	63	85	82	1
SHROOM3	0	0	7080	0.001	31.9684	2.49116e-222	681450	0	1.22306	1.22306	0.937937	0.155789	0	82	72	83	1
THSD4	0	0	11869	0.001	35.3574	4.95601e-271	681450	0	1.04548	1.04548	0.880335	0.245546	0	65	91	84	1
CDCP1	0	0	7392	0.001	33.9877	8.58762e-251	681450	0	1.21106	1.21106	0.935013	0.162467	0	86	74	85	1
VWA1	5.789e-319	1.59927372e-314	6886	0.001	32.4731	2.62948e-229	681450	0	1.20689	1.20689	0.938983	0.150866	1.14585867465e-313	87	75	86	1
SPINT1	0	0	7474	0.001	33.7222	5.97096e-247	681450	0	1.18892	1.18892	0.933567	0.163543	0	83	79	87	1
DSP	0	0	7994	0.001	32.1587	5.89017e-225	681450	0	1.12476	1.12476	0.926213	0.17219	0	84	83	88	1
MACC1	0	0	8360	0.001	31.1061	9.46455e-211	681450	0	1.07154	1.07154	0.921567	0.178806	0	85	87	89	1
IGFBP3	1.55794e-292	4.30396e-288	6978	0.001	29.5461	1.85119e-190	681450	0	1.16561	1.16561	0.936306	0.15102	2.88794e-287	91	81	90	1
ADM	4.32677e-274	1.19531e-269	8021	0.001	30.3256	1.84067e-200	681450	0	1.07133	1.07133	0.921567	0.168374	7.89518e-269	92	88	91	1
ST14	2.88469e-304	7.96924e-300	8950	0.001	32.943	6.71634e-236	681450	0	1.0333	1.0333	0.911751	0.187144	5.43357e-299	90	92	92	1
C1QC	1.94138e-224	5.36326e-220	8479	0.694147	31.2908	3.49183e-213	681450	0	0.939724	0.939724	0.91132	0.172221	3.08462e-219	93	93	93	1
RNASE1	5.42303e-165	1.49817e-160	12438	0.694147	32.8632	1.0295e-234	681450	0	0.734156	0.734156	0.849595	0.232315	7.32156e-160	94	94	94	1
